# Supplementary material for: Cooperative adsorption behavior of phosphopeptides on TiO2 leads to biased enrichment, detection and quantification
Source: Royal Society of Chemistry journal article supplement (doi:10.1039/c4an01580k), 2014-10-15
Supplement: c4an01580k1.pdf [file c4an01580k1.pdf]

## Supporting Information

### Cooperative adsorption behavior of phosphopeptides on TiO<sub>2</sub> leads to biased enrichment, detection and quantification

Anna I. K. Eriksson, Katarina Edwards and Víctor Agmo Hernández

Department of Chemistry – BMC, Uppsala University, Uppsala, Sweden

#### Table of contents

**Appendix A.** Raw data and significance tests: steel target vs. TiO<sub>2</sub> spot

**Appendix B.** Raw data and significance tests: TiO<sub>2</sub> non-washed vs. washed with salicylic acid

**Appendix C.** Raw data and significance tests: TiO<sub>2</sub> non-washed vs. washed with buffer pH 8

**Appendix D.** Raw data and significance tests: TiO<sub>2</sub> non-washed vs. washed with buffer pH 9

**Appendix E.** Raw data and significance tests: TiO<sub>2</sub> non-washed vs. washed with buffer pH 1.3

**Appendix F.** Raw data and significance tests: TiO<sub>2</sub> non-washed vs. washed with 10 mM phosphate

# Appendix A

Raw data and significance tests

Steel target vs. TiO<sub>2</sub> spot

**Steel target**

|         | S-R      | S-2R     | Y-R      | Y-2R     |
|---------|----------|----------|----------|----------|
| 1       | 1878     | 1321     | 3683     | 2957     |
| 2       | 3772     | 2475     | 6968     | 4717     |
| 3       | 2617     | 1765     | 4462     | 3147     |
| 4       | 754      | 391      | 1666     | 892      |
| 5       | 2520     | 1635     | 5181     | 3500     |
| 6       | 1380     | 777      | 2591     | 1550     |
| 7       | 2583     | 1906     | 5703     | 4355     |
| 8       | 1627     | 878      | 3624     | 2173     |
| 9       | 8663     | 6040     | 12406    | 8839     |
| 10      | 1802     | 933      | 3500     | 1928     |
| 11      | 4458     | 3136     | 7290     | 5295     |
| 12      | 4491     | 2985     | 8007     | 5266     |
| 13      | 2137     | 1204     | 4220     | 2682     |
| 14      | 967      | 538      | 1897     | 1145     |
| 15      | 5106     | 2988     | 8556     | 5522     |
| 16      | 4295     | 2414     | 7893     | 4937     |
| 17      | 2280     | 1341     | 3995     | 2534     |
| 18      | 2888     | 1835     | 5047     | 3520     |
| Average | 3012.111 | 1920.111 | 5371.611 | 3608.833 |
| Stdev   | 1899.411 | 1333.141 | 2726.765 | 1961.43  |
| SEM     | 447.6954 | 314.2242 | 642.7048 | 462.3134 |

**Enriched**

|         | S-R      | S-2R     | Y-R      | Y-2R     |
|---------|----------|----------|----------|----------|
| 1       | 3102     | 1118     | 4080     | 1086     |
| 2       | 1497     | 972      | 3370     | 1755     |
| 3       | 869      | 429      | 2735     | 788      |
| 4       | 1219     | 1196     | 2482     | 1712     |
| 5       | 530      | 461      | 1245     | 665      |
| 6       | 2603     | 741      | 4347     | 797      |
| 7       | 5549     | 3568     | 12181    | 6507     |
| 8       | 3722     | 2850     | 7000     | 5412     |
| 9       | 2580     | 689      | 6227     | 1292     |
| 10      | 2118     | 2640     | 4632     | 5398     |
| 11      | 4258     | 2712     | 11499    | 6440     |
| 12      | 5030     | 2047     | 9804     | 3752     |
| 13      | 2657     | 1655     | 8280     | 3483     |
| 14      | 3409     | 1499     | 7932     | 2954     |
| 15      | 1939     | 904      | 3642     | 1660     |
| 16      | 2029     | 980      | 3272     | 1625     |
| 17      | 1957     | 892      | 3556     | 1502     |
| 18      | 1406     | 645      | 2655     | 1171     |
| 19      | 2122     | 976      | 4093     | 1847     |
| 20      | 847      | 340      | 1921     | 728      |
| 21      | 1546     | 932      | 3230     | 1716     |
| 22      | 2495     | 1058     | 3189     | 1275     |
| 23      | 1928     | 1123     | 3698     | 2125     |
| Average | 2409.217 | 1322.913 | 5003.043 | 2421.304 |
| Stdev   | 1293.283 | 864.8099 | 3031.676 | 1845.683 |
| SEM     | 269.6681 | 180.3253 | 632.1481 | 384.8516 |

TiO2/Steel ratios

| mod-S-R    |      | Steel |      |      |      |      |      |      |      |      |      |      |      |      |      |      |      |      |      |
|------------|------|-------|------|------|------|------|------|------|------|------|------|------|------|------|------|------|------|------|------|
| Exp        |      | 1     | 2    | 3    | 4    | 5    | 6    | 7    | 8    | 9    | 10   | 11   | 12   | 13   | 14   | 15   | 16   | 17   | 18   |
| Experiment | TiO2 | 1878  | 3772 | 2617 | 754  | 2520 | 1380 | 2583 | 1627 | 8663 | 1802 | 4458 | 4491 | 2137 | 967  | 5106 | 4295 | 2280 | 2888 |
| 1          | 3102 | 1.65  | 0.82 | 1.19 | 4.11 | 1.23 | 2.25 | 1.20 | 1.91 | 0.36 | 1.72 | 0.70 | 0.69 | 1.45 | 3.21 | 0.61 | 0.72 | 1.36 | 1.07 |
| 2          | 1497 | 0.80  | 0.40 | 0.57 | 1.99 | 0.59 | 1.08 | 0.58 | 0.92 | 0.17 | 0.83 | 0.34 | 0.33 | 0.70 | 1.55 | 0.29 | 0.35 | 0.66 | 0.52 |
| 3          | 869  | 0.46  | 0.23 | 0.33 | 1.15 | 0.34 | 0.63 | 0.34 | 0.53 | 0.10 | 0.48 | 0.19 | 0.19 | 0.41 | 0.90 | 0.17 | 0.20 | 0.38 | 0.30 |
| 4          | 1219 | 0.65  | 0.32 | 0.47 | 1.62 | 0.48 | 0.88 | 0.47 | 0.75 | 0.14 | 0.68 | 0.27 | 0.27 | 0.57 | 1.26 | 0.24 | 0.28 | 0.53 | 0.42 |
| 5          | 530  | 0.28  | 0.14 | 0.20 | 0.70 | 0.21 | 0.38 | 0.21 | 0.33 | 0.06 | 0.29 | 0.12 | 0.12 | 0.25 | 0.55 | 0.10 | 0.12 | 0.23 | 0.18 |
| 6          | 2603 | 1.39  | 0.69 | 0.99 | 3.45 | 1.03 | 1.89 | 1.01 | 1.60 | 0.30 | 1.44 | 0.58 | 0.58 | 1.22 | 2.69 | 0.51 | 0.61 | 1.14 | 0.90 |
| 7          | 5549 | 2.95  | 1.47 | 2.12 | 7.36 | 2.20 | 4.02 | 2.15 | 3.41 | 0.64 | 3.08 | 1.24 | 1.24 | 2.60 | 5.74 | 1.09 | 1.29 | 2.43 | 1.92 |
| 8          | 3722 | 1.98  | 0.99 | 1.42 | 4.94 | 1.48 | 2.70 | 1.44 | 2.29 | 0.43 | 2.07 | 0.83 | 0.83 | 1.74 | 3.85 | 0.73 | 0.87 | 1.63 | 1.29 |
| 9          | 2580 | 1.37  | 0.68 | 0.99 | 3.42 | 1.02 | 1.87 | 1.00 | 1.59 | 0.30 | 1.43 | 0.58 | 0.57 | 1.21 | 2.67 | 0.51 | 0.60 | 1.13 | 0.89 |
| 10         | 2118 | 1.13  | 0.56 | 0.81 | 2.81 | 0.84 | 1.53 | 0.82 | 1.30 | 0.24 | 1.18 | 0.48 | 0.47 | 0.99 | 2.19 | 0.41 | 0.49 | 0.93 | 0.73 |
| 11         | 4258 | 2.27  | 1.13 | 1.63 | 5.65 | 1.69 | 3.09 | 1.65 | 2.62 | 0.49 | 2.36 | 0.96 | 0.95 | 1.99 | 4.40 | 0.83 | 0.99 | 1.87 | 1.47 |
| 12         | 5030 | 2.68  | 1.33 | 1.92 | 6.67 | 2.00 | 3.64 | 1.95 | 3.09 | 0.58 | 2.79 | 1.13 | 1.12 | 2.35 | 5.20 | 0.99 | 1.17 | 2.21 | 1.74 |
| 13         | 2657 | 1.41  | 0.70 | 1.02 | 3.52 | 1.05 | 1.93 | 1.03 | 1.63 | 0.31 | 1.47 | 0.60 | 0.59 | 1.24 | 2.75 | 0.52 | 0.62 | 1.17 | 0.92 |
| 14         | 3409 | 1.82  | 0.90 | 1.30 | 4.52 | 1.35 | 2.47 | 1.32 | 2.10 | 0.39 | 1.89 | 0.76 | 0.76 | 1.60 | 3.53 | 0.67 | 0.79 | 1.50 | 1.18 |
| 15         | 1939 | 1.03  | 0.51 | 0.74 | 2.57 | 0.77 | 1.41 | 0.75 | 1.19 | 0.22 | 1.08 | 0.43 | 0.43 | 0.91 | 2.01 | 0.38 | 0.45 | 0.85 | 0.67 |
| 16         | 2029 | 1.08  | 0.54 | 0.78 | 2.69 | 0.81 | 1.47 | 0.79 | 1.25 | 0.23 | 1.13 | 0.46 | 0.45 | 0.95 | 2.10 | 0.40 | 0.47 | 0.89 | 0.70 |
| 17         | 1957 | 1.04  | 0.52 | 0.75 | 2.60 | 0.78 | 1.42 | 0.76 | 1.20 | 0.23 | 1.09 | 0.44 | 0.44 | 0.92 | 2.02 | 0.38 | 0.46 | 0.86 | 0.68 |
| 18         | 1406 | 0.75  | 0.37 | 0.54 | 1.86 | 0.56 | 1.02 | 0.54 | 0.86 | 0.16 | 0.78 | 0.32 | 0.31 | 0.66 | 1.45 | 0.28 | 0.33 | 0.62 | 0.49 |
| 19         | 2122 | 1.13  | 0.56 | 0.81 | 2.81 | 0.84 | 1.54 | 0.82 | 1.30 | 0.24 | 1.18 | 0.48 | 0.47 | 0.99 | 2.19 | 0.42 | 0.49 | 0.93 | 0.73 |
| 20         | 847  | 0.45  | 0.22 | 0.32 | 1.12 | 0.34 | 0.61 | 0.33 | 0.52 | 0.10 | 0.47 | 0.19 | 0.19 | 0.40 | 0.88 | 0.17 | 0.20 | 0.37 | 0.29 |
| 21         | 1546 | 0.82  | 0.41 | 0.59 | 2.05 | 0.61 | 1.12 | 0.60 | 0.95 | 0.18 | 0.86 | 0.35 | 0.34 | 0.72 | 1.60 | 0.30 | 0.36 | 0.68 | 0.54 |
| 22         | 2495 | 1.33  | 0.66 | 0.95 | 3.31 | 0.99 | 1.81 | 0.97 | 1.53 | 0.29 | 1.38 | 0.56 | 0.56 | 1.17 | 2.58 | 0.49 | 0.58 | 1.09 | 0.86 |
| 23         | 1928 | 1.03  | 0.51 | 0.74 | 2.56 | 0.77 | 1.40 | 0.75 | 1.19 | 0.22 | 1.07 | 0.43 | 0.43 | 0.90 | 1.99 | 0.38 | 0.45 | 0.85 | 0.67 |

| mod-S-2R |      | Steel |      |      |      |      |      |      |      |      |      |      |      |      |      |      |      |      |      |
|----------|------|-------|------|------|------|------|------|------|------|------|------|------|------|------|------|------|------|------|------|
| Exp      |      | 1     | 2    | 3    | 4    | 5    | 6    | 7    | 8    | 9    | 10   | 11   | 12   | 13   | 14   | 15   | 16   | 17   | 18   |
| TiO2     |      | 1321  | 2475 | 1765 | 391  | 1635 | 777  | 1906 | 878  | 6040 | 933  | 3136 | 2985 | 1204 | 538  | 2988 | 2414 | 1341 | 1835 |
| 1        | 1118 | 0.85  | 0.45 | 0.63 | 2.86 | 0.68 | 1.44 | 0.59 | 1.27 | 0.19 | 1.20 | 0.36 | 0.37 | 0.93 | 2.08 | 0.37 | 0.46 | 0.83 | 0.61 |
| 2        | 972  | 0.74  | 0.39 | 0.55 | 2.49 | 0.59 | 1.25 | 0.51 | 1.11 | 0.16 | 1.04 | 0.31 | 0.33 | 0.81 | 1.81 | 0.33 | 0.40 | 0.72 | 0.53 |
| 3        | 429  | 0.32  | 0.17 | 0.24 | 1.10 | 0.26 | 0.55 | 0.23 | 0.49 | 0.07 | 0.46 | 0.14 | 0.14 | 0.36 | 0.80 | 0.14 | 0.18 | 0.32 | 0.23 |
| 4        | 1196 | 0.91  | 0.48 | 0.68 | 3.06 | 0.73 | 1.54 | 0.63 | 1.36 | 0.20 | 1.28 | 0.38 | 0.40 | 0.99 | 2.22 | 0.40 | 0.50 | 0.89 | 0.65 |
| 5        | 461  | 0.35  | 0.19 | 0.26 | 1.18 | 0.28 | 0.59 | 0.24 | 0.53 | 0.08 | 0.49 | 0.15 | 0.15 | 0.38 | 0.86 | 0.15 | 0.19 | 0.34 | 0.25 |
| 6        | 741  | 0.56  | 0.30 | 0.42 | 1.90 | 0.45 | 0.95 | 0.39 | 0.84 | 0.12 | 0.79 | 0.24 | 0.25 | 0.62 | 1.38 | 0.25 | 0.31 | 0.55 | 0.40 |
| 7        | 3568 | 2.70  | 1.44 | 2.02 | 9.13 | 2.18 | 4.59 | 1.87 | 4.06 | 0.59 | 3.82 | 1.14 | 1.20 | 2.96 | 6.63 | 1.19 | 1.48 | 2.66 | 1.94 |
| 8        | 2850 | 2.16  | 1.15 | 1.61 | 7.29 | 1.74 | 3.67 | 1.50 | 3.25 | 0.47 | 3.05 | 0.91 | 0.95 | 2.37 | 5.30 | 0.95 | 1.18 | 2.13 | 1.55 |
| 9        | 689  | 0.52  | 0.28 | 0.39 | 1.76 | 0.42 | 0.89 | 0.36 | 0.78 | 0.11 | 0.74 | 0.22 | 0.23 | 0.57 | 1.28 | 0.23 | 0.29 | 0.51 | 0.38 |
| 10       | 2640 | 2.00  | 1.07 | 1.50 | 6.75 | 1.61 | 3.40 | 1.39 | 3.01 | 0.44 | 2.83 | 0.84 | 0.88 | 2.19 | 4.91 | 0.88 | 1.09 | 1.97 | 1.44 |
| 11       | 2712 | 2.05  | 1.10 | 1.54 | 6.94 | 1.66 | 3.49 | 1.42 | 3.09 | 0.45 | 2.91 | 0.86 | 0.91 | 2.25 | 5.04 | 0.91 | 1.12 | 2.02 | 1.48 |
| 12       | 2047 | 1.55  | 0.83 | 1.16 | 5.24 | 1.25 | 2.63 | 1.07 | 2.33 | 0.34 | 2.19 | 0.65 | 0.69 | 1.70 | 3.80 | 0.69 | 0.85 | 1.53 | 1.12 |
| 13       | 1655 | 1.25  | 0.67 | 0.94 | 4.23 | 1.01 | 2.13 | 0.87 | 1.88 | 0.27 | 1.77 | 0.53 | 0.55 | 1.37 | 3.08 | 0.55 | 0.69 | 1.23 | 0.90 |
| 14       | 1499 | 1.13  | 0.61 | 0.85 | 3.83 | 0.92 | 1.93 | 0.79 | 1.71 | 0.25 | 1.61 | 0.48 | 0.50 | 1.25 | 2.79 | 0.50 | 0.62 | 1.12 | 0.82 |
| 15       | 904  | 0.68  | 0.37 | 0.51 | 2.31 | 0.55 | 1.16 | 0.47 | 1.03 | 0.15 | 0.97 | 0.29 | 0.30 | 0.75 | 1.68 | 0.30 | 0.37 | 0.67 | 0.49 |
| 16       | 980  | 0.74  | 0.40 | 0.56 | 2.51 | 0.60 | 1.26 | 0.51 | 1.12 | 0.16 | 1.05 | 0.31 | 0.33 | 0.81 | 1.82 | 0.33 | 0.41 | 0.73 | 0.53 |
| 17       | 892  | 0.68  | 0.36 | 0.51 | 2.28 | 0.55 | 1.15 | 0.47 | 1.02 | 0.15 | 0.96 | 0.28 | 0.30 | 0.74 | 1.66 | 0.30 | 0.37 | 0.67 | 0.49 |
| 18       | 645  | 0.49  | 0.26 | 0.37 | 1.65 | 0.39 | 0.83 | 0.34 | 0.73 | 0.11 | 0.69 | 0.21 | 0.22 | 0.54 | 1.20 | 0.22 | 0.27 | 0.48 | 0.35 |
| 19       | 976  | 0.74  | 0.39 | 0.55 | 2.50 | 0.60 | 1.26 | 0.51 | 1.11 | 0.16 | 1.05 | 0.31 | 0.33 | 0.81 | 1.81 | 0.33 | 0.40 | 0.73 | 0.53 |
| 20       | 340  | 0.26  | 0.14 | 0.19 | 0.87 | 0.21 | 0.44 | 0.18 | 0.39 | 0.06 | 0.36 | 0.11 | 0.11 | 0.28 | 0.63 | 0.11 | 0.14 | 0.25 | 0.19 |
| 21       | 932  | 0.71  | 0.38 | 0.53 | 2.38 | 0.57 | 1.20 | 0.49 | 1.06 | 0.15 | 1.00 | 0.30 | 0.31 | 0.77 | 1.73 | 0.31 | 0.39 | 0.70 | 0.51 |
| 22       | 1058 | 0.80  | 0.43 | 0.60 | 2.71 | 0.65 | 1.36 | 0.56 | 1.21 | 0.18 | 1.13 | 0.34 | 0.35 | 0.88 | 1.97 | 0.35 | 0.44 | 0.79 | 0.58 |
| 23       | 1123 | 0.85  | 0.45 | 0.64 | 2.87 | 0.69 | 1.45 | 0.59 | 1.28 | 0.19 | 1.20 | 0.36 | 0.38 | 0.93 | 2.09 | 0.38 | 0.47 | 0.84 | 0.61 |

| mod-Y-R |       | Steel |      |      |      |      |      |      |      |       |      |      |      |      |      |      |      |      |      |
|---------|-------|-------|------|------|------|------|------|------|------|-------|------|------|------|------|------|------|------|------|------|
| Exp     |       | 1     | 2    | 3    | 4    | 5    | 6    | 7    | 8    | 9     | 10   | 11   | 12   | 13   | 14   | 15   | 16   | 17   | 18   |
| TiO2    |       | 3683  | 6968 | 4462 | 1666 | 5181 | 2591 | 5703 | 3624 | 12406 | 3500 | 7290 | 8007 | 4220 | 1897 | 8556 | 7893 | 3995 | 5047 |
| 1       | 4080  | 1.11  | 0.59 | 0.91 | 2.45 | 0.79 | 1.57 | 0.72 | 1.13 | 0.33  | 1.17 | 0.56 | 0.51 | 0.97 | 2.15 | 0.48 | 0.52 | 1.02 | 0.81 |
| 2       | 3370  | 0.92  | 0.48 | 0.76 | 2.02 | 0.65 | 1.30 | 0.59 | 0.93 | 0.27  | 0.96 | 0.46 | 0.42 | 0.80 | 1.78 | 0.39 | 0.43 | 0.84 | 0.67 |
| 3       | 2735  | 0.74  | 0.39 | 0.61 | 1.64 | 0.53 | 1.06 | 0.48 | 0.75 | 0.22  | 0.78 | 0.38 | 0.34 | 0.65 | 1.44 | 0.32 | 0.35 | 0.68 | 0.54 |
| 4       | 2482  | 0.67  | 0.36 | 0.56 | 1.49 | 0.48 | 0.96 | 0.44 | 0.68 | 0.20  | 0.71 | 0.34 | 0.31 | 0.59 | 1.31 | 0.29 | 0.31 | 0.62 | 0.49 |
| 5       | 1245  | 0.34  | 0.18 | 0.28 | 0.75 | 0.24 | 0.48 | 0.22 | 0.34 | 0.10  | 0.36 | 0.17 | 0.16 | 0.30 | 0.66 | 0.15 | 0.16 | 0.31 | 0.25 |
| 6       | 4347  | 1.18  | 0.62 | 0.97 | 2.61 | 0.84 | 1.68 | 0.76 | 1.20 | 0.35  | 1.24 | 0.60 | 0.54 | 1.03 | 2.29 | 0.51 | 0.55 | 1.09 | 0.86 |
| 7       | 12181 | 3.31  | 1.75 | 2.73 | 7.31 | 2.35 | 4.70 | 2.14 | 3.36 | 0.98  | 3.48 | 1.67 | 1.52 | 2.89 | 6.42 | 1.42 | 1.54 | 3.05 | 2.41 |
| 8       | 7000  | 1.90  | 1.00 | 1.57 | 4.20 | 1.35 | 2.70 | 1.23 | 1.93 | 0.56  | 2.00 | 0.96 | 0.87 | 1.66 | 3.69 | 0.82 | 0.89 | 1.75 | 1.39 |
| 9       | 6227  | 1.69  | 0.89 | 1.40 | 3.74 | 1.20 | 2.40 | 1.09 | 1.72 | 0.50  | 1.78 | 0.85 | 0.78 | 1.48 | 3.28 | 0.73 | 0.79 | 1.56 | 1.23 |
| 10      | 4632  | 1.26  | 0.66 | 1.04 | 2.78 | 0.89 | 1.79 | 0.81 | 1.28 | 0.37  | 1.32 | 0.64 | 0.58 | 1.10 | 2.44 | 0.54 | 0.59 | 1.16 | 0.92 |
| 11      | 11499 | 3.12  | 1.65 | 2.58 | 6.90 | 2.22 | 4.44 | 2.02 | 3.17 | 0.93  | 3.29 | 1.58 | 1.44 | 2.72 | 6.06 | 1.34 | 1.46 | 2.88 | 2.28 |
| 12      | 9804  | 2.66  | 1.41 | 2.20 | 5.88 | 1.89 | 3.78 | 1.72 | 2.71 | 0.79  | 2.80 | 1.34 | 1.22 | 2.32 | 5.17 | 1.15 | 1.24 | 2.45 | 1.94 |
| 13      | 8280  | 2.25  | 1.19 | 1.86 | 4.97 | 1.60 | 3.20 | 1.45 | 2.28 | 0.67  | 2.37 | 1.14 | 1.03 | 1.96 | 4.36 | 0.97 | 1.05 | 2.07 | 1.64 |
| 14      | 7932  | 2.15  | 1.14 | 1.78 | 4.76 | 1.53 | 3.06 | 1.39 | 2.19 | 0.64  | 2.27 | 1.09 | 0.99 | 1.88 | 4.18 | 0.93 | 1.00 | 1.99 | 1.57 |
| 15      | 3642  | 0.99  | 0.52 | 0.82 | 2.19 | 0.70 | 1.41 | 0.64 | 1.00 | 0.29  | 1.04 | 0.50 | 0.45 | 0.86 | 1.92 | 0.43 | 0.46 | 0.91 | 0.72 |
| 16      | 3     |       |      |      |      |      |      |      |      |       |      |      |      |      |      |      |      |      |      |

TiO2/Steel signal ratios

| mod-Y-2R |      | Steel |      |      |      |      |      |      |      |      |      |      |      |      |      |      |      |      |      |
|----------|------|-------|------|------|------|------|------|------|------|------|------|------|------|------|------|------|------|------|------|
| Exp      |      | 1     | 2    | 3    | 4    | 5    | 6    | 7    | 8    | 9    | 10   | 11   | 12   | 13   | 14   | 15   | 16   | 17   | 18   |
| TiO2     |      | 2957  | 4717 | 3147 | 892  | 3500 | 1550 | 4355 | 2173 | 8839 | 1928 | 5295 | 5266 | 2682 | 1145 | 5522 | 4937 | 2534 | 3520 |
| 1        | 1086 | 0.37  | 0.23 | 0.35 | 1.22 | 0.31 | 0.70 | 0.25 | 0.50 | 0.12 | 0.56 | 0.21 | 0.21 | 0.40 | 0.95 | 0.20 | 0.22 | 0.43 | 0.31 |
| 2        | 1755 | 0.59  | 0.37 | 0.56 | 1.97 | 0.50 | 1.13 | 0.40 | 0.81 | 0.20 | 0.91 | 0.33 | 0.33 | 0.65 | 1.53 | 0.32 | 0.36 | 0.69 | 0.50 |
| 3        | 788  | 0.27  | 0.17 | 0.25 | 0.88 | 0.23 | 0.51 | 0.18 | 0.36 | 0.09 | 0.41 | 0.15 | 0.15 | 0.29 | 0.69 | 0.14 | 0.16 | 0.31 | 0.22 |
| 4        | 1712 | 0.58  | 0.36 | 0.54 | 1.92 | 0.49 | 1.10 | 0.39 | 0.79 | 0.19 | 0.89 | 0.32 | 0.33 | 0.64 | 1.50 | 0.31 | 0.35 | 0.68 | 0.49 |
| 5        | 665  | 0.22  | 0.14 | 0.21 | 0.75 | 0.19 | 0.43 | 0.15 | 0.31 | 0.08 | 0.34 | 0.13 | 0.13 | 0.25 | 0.58 | 0.12 | 0.13 | 0.26 | 0.19 |
| 6        | 797  | 0.27  | 0.17 | 0.25 | 0.89 | 0.23 | 0.51 | 0.18 | 0.37 | 0.09 | 0.41 | 0.15 | 0.15 | 0.30 | 0.70 | 0.14 | 0.16 | 0.31 | 0.23 |
| 7        | 6507 | 2.20  | 1.38 | 2.07 | 7.29 | 1.86 | 4.20 | 1.49 | 2.99 | 0.74 | 3.38 | 1.23 | 1.24 | 2.43 | 5.68 | 1.18 | 1.32 | 2.57 | 1.85 |
| 8        | 5412 | 1.83  | 1.15 | 1.72 | 6.07 | 1.55 | 3.49 | 1.24 | 2.49 | 0.61 | 2.81 | 1.02 | 1.03 | 2.02 | 4.73 | 0.98 | 1.10 | 2.14 | 1.54 |
| 9        | 1292 | 0.44  | 0.27 | 0.41 | 1.45 | 0.37 | 0.83 | 0.30 | 0.59 | 0.15 | 0.67 | 0.24 | 0.25 | 0.48 | 1.13 | 0.23 | 0.26 | 0.51 | 0.37 |
| 10       | 5398 | 1.83  | 1.14 | 1.72 | 6.05 | 1.54 | 3.48 | 1.24 | 2.48 | 0.61 | 2.80 | 1.02 | 1.03 | 2.01 | 4.71 | 0.98 | 1.09 | 2.13 | 1.53 |
| 11       | 6440 | 2.18  | 1.37 | 2.05 | 7.22 | 1.84 | 4.15 | 1.48 | 2.96 | 0.73 | 3.34 | 1.22 | 1.22 | 2.40 | 5.62 | 1.17 | 1.30 | 2.54 | 1.83 |
| 12       | 3752 | 1.27  | 0.80 | 1.19 | 4.21 | 1.07 | 2.42 | 0.86 | 1.73 | 0.42 | 1.95 | 0.71 | 0.71 | 1.40 | 3.28 | 0.68 | 0.76 | 1.48 | 1.07 |
| 13       | 3483 | 1.18  | 0.74 | 1.11 | 3.90 | 1.00 | 2.25 | 0.80 | 1.60 | 0.39 | 1.81 | 0.66 | 0.66 | 1.30 | 3.04 | 0.63 | 0.71 | 1.37 | 0.99 |
| 14       | 2954 | 1.00  | 0.63 | 0.94 | 3.31 | 0.84 | 1.91 | 0.68 | 1.36 | 0.33 | 1.53 | 0.56 | 0.56 | 1.10 | 2.58 | 0.53 | 0.60 | 1.17 | 0.84 |
| 15       | 1660 | 0.56  | 0.35 | 0.53 | 1.86 | 0.47 | 1.07 | 0.38 | 0.76 | 0.19 | 0.86 | 0.31 | 0.32 | 0.62 | 1.45 | 0.30 | 0.34 | 0.66 | 0.47 |
| 16       | 1625 | 0.55  | 0.34 | 0.52 | 1.82 | 0.46 | 1.05 | 0.37 | 0.75 | 0.18 | 0.84 | 0.31 | 0.31 | 0.61 | 1.42 | 0.29 | 0.33 | 0.64 | 0.46 |
| 17       | 1502 | 0.51  | 0.32 | 0.48 | 1.68 | 0.43 | 0.97 | 0.34 | 0.69 | 0.17 | 0.78 | 0.28 | 0.29 | 0.56 | 1.31 | 0.27 | 0.30 | 0.59 | 0.43 |
| 18       | 1171 | 0.40  | 0.25 | 0.37 | 1.31 | 0.33 | 0.76 | 0.27 | 0.54 | 0.13 | 0.61 | 0.22 | 0.22 | 0.44 | 1.02 | 0.21 | 0.24 | 0.46 | 0.33 |
| 19       | 1847 | 0.62  | 0.39 | 0.59 | 2.07 | 0.53 | 1.19 | 0.42 | 0.85 | 0.21 | 0.96 | 0.35 | 0.35 | 0.69 | 1.61 | 0.33 | 0.37 | 0.73 | 0.52 |
| 20       | 728  | 0.25  | 0.15 | 0.23 | 0.82 | 0.21 | 0.47 | 0.17 | 0.34 | 0.08 | 0.38 | 0.14 | 0.14 | 0.27 | 0.64 | 0.13 | 0.15 | 0.29 | 0.21 |
| 21       | 1716 | 0.58  | 0.36 | 0.55 | 1.92 | 0.49 | 1.11 | 0.39 | 0.79 | 0.19 | 0.89 | 0.32 | 0.33 | 0.64 | 1.50 | 0.31 | 0.35 | 0.68 | 0.49 |
| 22       | 1275 | 0.43  | 0.27 | 0.41 | 1.43 | 0.36 | 0.82 | 0.29 | 0.59 | 0.14 | 0.66 | 0.24 | 0.24 | 0.48 | 1.11 | 0.23 | 0.26 | 0.50 | 0.36 |
| 23       | 2125 | 0.72  | 0.45 | 0.68 | 2.38 | 0.61 | 1.37 | 0.49 | 0.98 | 0.24 | 1.10 | 0.40 | 0.40 | 0.79 | 1.86 | 0.38 | 0.43 | 0.84 | 0.60 |

Significance test

TiO<sub>2</sub>/Steel signal area ratio

|          | Average | SEM  |
|----------|---------|------|
| mod-S-R  | 1.13    | 0.05 |
| mod-S-2R | 1.06    | 0.06 |
| mod-Y-R  | 1.21    | 0.05 |
| mod-Y-2R | 0.93    | 0.05 |

Paired t-test

TiO<sub>2</sub> vs Steel

p-values for all pairs

|          | mod-S-R  | mod-S-2R | mod-Y-R  | mod-Y-2R |
|----------|----------|----------|----------|----------|
| mod-S-R  |          | 0.007    | 6.78E-06 | 1.07E-11 |
| mod-S-2R | 0.007    |          | 1.01E-07 | 4.82E-21 |
| mod-Y-R  | 6.78E-06 | 1.01E-07 |          | 1.50E-25 |
| mod-Y-2R | 1.07E-11 | 4.82E-21 | 1.50E-25 |          |

Significant difference between peptides

Not significant difference between peptides

# Appendix B

Raw data and significance tests

TiO<sub>2</sub>: non-washed vs. washed with salicylic acid

**TiO2**

|         | S-R      | S-2R     | Y-R      | Y-2R     |
|---------|----------|----------|----------|----------|
| 1       | 3102     | 1118     | 4080     | 1086     |
| 2       | 1497     | 972      | 3370     | 1755     |
| 3       | 869      | 429      | 2735     | 788      |
| 4       | 1219     | 1196     | 2482     | 1712     |
| 5       | 530      | 461      | 1245     | 665      |
| 6       | 2603     | 741      | 4347     | 797      |
| 7       | 5549     | 3568     | 12181    | 6507     |
| 8       | 3722     | 2850     | 7000     | 5412     |
| 9       | 2580     | 689      | 6227     | 1292     |
| 10      | 2118     | 2640     | 4632     | 5398     |
| 11      | 4258     | 2712     | 11499    | 6440     |
| 12      | 5030     | 2047     | 9804     | 3752     |
| 13      | 2657     | 1655     | 8280     | 3483     |
| 14      | 3409     | 1499     | 7932     | 2954     |
| 15      | 1939     | 904      | 3642     | 1660     |
| 16      | 2029     | 980      | 3272     | 1625     |
| 17      | 1957     | 892      | 3556     | 1502     |
| 18      | 1406     | 645      | 2655     | 1171     |
| 19      | 2122     | 976      | 4093     | 1847     |
| 20      | 847      | 340      | 1921     | 728      |
| 21      | 1546     | 932      | 3230     | 1716     |
| 22      | 2495     | 1058     | 3189     | 1275     |
| 23      | 1928     | 1123     | 3698     | 2125     |
| Average | 2409.217 | 1322.913 | 5003.043 | 2421.304 |
| Stdev   | 1293.283 | 864.8099 | 3031.676 | 1845.683 |
| SEM     | 269.6681 | 180.3253 | 632.1481 | 384.8516 |

**Salycilic acid**

|         | S-R      | S-2R     | Y-R      | Y-2R     |
|---------|----------|----------|----------|----------|
| 1       | 3307     | 1720     | 6405     | 3581     |
| 2       | 1422     | 495      | 2963     | 1205     |
| 3       | 4457     | 1882     | 10017    | 4173     |
| 4       | 2945     | 1485     | 5614     | 2591     |
| 5       | 1376     | 697      | 3280     | 1446     |
| 6       | 825      | 255      | 1668     | 537      |
| 7       | 2848     | 1571     | 4155     | 2005     |
| 8       | 558      | 236      | 1537     | 632      |
| 9       | 5015     | 2482     | 11936    | 6013     |
| 10      | 9498     | 4392     | 21660    | 8995     |
| 11      | 5656     | 2879     | 12586    | 5516     |
| 12      | 4508     | 2583     | 9259     | 5474     |
| 13      | 8590     | 4355     | 18591    | 7447     |
| 14      | 5158     | 3138     | 10658    | 6089     |
| 15      | 1428     | 952      | 4113     | 2797     |
| 16      | 9160     | 4402     | 19217    | 7774     |
| 17      | 5373     | 2752     | 12203    | 5637     |
| 18      | 5648     | 3405     | 12116    | 6485     |
| 19      | 8515     | 4753     | 15009    | 7594     |
| 20      | 3584     | 1791     | 7312     | 3454     |
| Average | 4493.55  | 2311.25  | 9514.95  | 4472.25  |
| Stdev   | 2798.351 | 1444.797 | 5981.448 | 2583.961 |
| SEM     | 625.7304 | 323.0664 | 1337.492 | 577.7912 |







Significance test

SA/TiO<sub>2</sub> signal area ratio

|          | Average | SEM  |
|----------|---------|------|
| mod-S-R  | 2.56    | 0.12 |
| mod-S-2R | 2.50    | 0.11 |
| mod-Y-R  | 2.60    | 0.11 |
| mod-Y-2R | 2.90    | 0.12 |

Paired t-test

TiO<sub>2</sub> vs SA

p-values for all pairs

|          | mod-S-R  | mod-S-2R | mod-Y-R  | mod-Y-2R |
|----------|----------|----------|----------|----------|
| mod-S-R  |          | 0.323    | 0.263    | 1.13E-06 |
| mod-S-2R | 0.323    |          | 0.119    | 6.10E-18 |
| mod-Y-R  | 0.263    | 0.119    |          | 1.49E-06 |
| mod-Y-2R | 1.13E-06 | 6.10E-18 | 1.49E-06 |          |

Significant difference between peptides

Not significant difference between peptides

# Appendix C

Raw data and significance tests

TiO<sub>2</sub>: non-washed vs. washed with buffer pH 8

## Raw data (signal area)

**TiO2**

|         | S-R      | S-2R     | Y-R      | Y-2R     |
|---------|----------|----------|----------|----------|
| 1       | 3102     | 1118     | 4080     | 1086     |
| 2       | 1497     | 972      | 3370     | 1755     |
| 3       | 869      | 429      | 2735     | 788      |
| 4       | 1219     | 1196     | 2482     | 1712     |
| 5       | 530      | 461      | 1245     | 665      |
| 6       | 2603     | 741      | 4347     | 797      |
| 7       | 5549     | 3568     | 12181    | 6507     |
| 8       | 3722     | 2850     | 7000     | 5412     |
| 9       | 2580     | 689      | 6227     | 1292     |
| 10      | 2118     | 2640     | 4632     | 5398     |
| 11      | 4258     | 2712     | 11499    | 6440     |
| 12      | 5030     | 2047     | 9804     | 3752     |
| 13      | 2657     | 1655     | 8280     | 3483     |
| 14      | 3409     | 1499     | 7932     | 2954     |
| 15      | 1939     | 904      | 3642     | 1660     |
| 16      | 2029     | 980      | 3272     | 1625     |
| 17      | 1957     | 892      | 3556     | 1502     |
| 18      | 1406     | 645      | 2655     | 1171     |
| 19      | 2122     | 976      | 4093     | 1847     |
| 20      | 847      | 340      | 1921     | 728      |
| 21      | 1546     | 932      | 3230     | 1716     |
| 22      | 2495     | 1058     | 3189     | 1275     |
| 23      | 1928     | 1123     | 3698     | 2125     |
| Average | 2409.217 | 1322.913 | 5003.043 | 2421.304 |
| Stdev   | 1293.283 | 864.8099 | 3031.676 | 1845.683 |
| SEM     | 269.6681 | 180.3253 | 632.1481 | 384.8516 |

**pH 8**

|         | S-R      | S-2R     | Y-R      | Y-2R     |
|---------|----------|----------|----------|----------|
| 1       | 659      | 504      | 1034     | 678      |
| 2       | 260      | 202      | 687      | 305      |
| 3       | 383      | 28       | 547      | 39       |
| 4       | 738      | 367      | 1412     | 561      |
| 5       | 485      | 312      | 1077     | 578      |
| 6       | 452      | 145      | 781      | 180      |
| 7       | 741      | 482      | 1194     | 692      |
| 8       | 377      | 183      | 714      | 321      |
| 9       | 431      | 158      | 894      | 218      |
| 10      | 248      |          | 439      | 153      |
| 11      | 262      | 185      | 514      | 363      |
| Average | 457.8182 | 256.6    | 844.8182 | 371.6364 |
| Stdev   | 182.8359 | 154.6424 | 307.3528 | 223.7839 |
| SEM     | 55.1271  | 48.90222 | 92.67037 | 67.4734  |

pH 8 / TiO2 signal ratios

| mod-S-R    |            | TiO2 |      |      |      |      |      |      |      |      |      |      |      |      |      |      |      |      |      |      |      |      |      |      |
|------------|------------|------|------|------|------|------|------|------|------|------|------|------|------|------|------|------|------|------|------|------|------|------|------|------|
| Exp        |            | 1    | 2    | 3    | 4    | 5    | 6    | 7    | 8    | 9    | 10   | 11   | 12   | 13   | 14   | 15   | 16   | 17   | 18   | 19   | 20   | 21   | 22   | 23   |
| Experiment | <b>pH8</b> | 3102 | 1497 | 869  | 1219 | 530  | 2603 | 5549 | 3722 | 2580 | 2118 | 4258 | 5030 | 2657 | 3409 | 1939 | 2029 | 1957 | 1406 | 2122 | 847  | 1546 | 2495 | 1928 |
| 1          | 659        | 0.21 | 0.44 | 0.76 | 0.54 | 1.24 | 0.25 | 0.12 | 0.18 | 0.26 | 0.31 | 0.15 | 0.13 | 0.25 | 0.19 | 0.34 | 0.32 | 0.34 | 0.47 | 0.31 | 0.78 | 0.43 | 0.26 | 0.34 |
| 2          | 260        | 0.08 | 0.17 | 0.30 | 0.21 | 0.49 | 0.10 | 0.05 | 0.07 | 0.10 | 0.12 | 0.06 | 0.05 | 0.10 | 0.08 | 0.13 | 0.13 | 0.13 | 0.18 | 0.12 | 0.31 | 0.17 | 0.10 | 0.13 |
| 3          | 383        | 0.12 | 0.26 | 0.44 | 0.31 | 0.72 | 0.15 | 0.07 | 0.10 | 0.15 | 0.18 | 0.09 | 0.08 | 0.14 | 0.11 | 0.20 | 0.19 | 0.20 | 0.27 | 0.18 | 0.45 | 0.25 | 0.15 | 0.20 |
| 4          | 738        | 0.24 | 0.49 | 0.85 | 0.61 | 1.39 | 0.28 | 0.13 | 0.20 | 0.29 | 0.35 | 0.17 | 0.15 | 0.28 | 0.22 | 0.38 | 0.36 | 0.38 | 0.52 | 0.35 | 0.87 | 0.48 | 0.30 | 0.38 |
| 5          | 485        | 0.16 | 0.32 | 0.56 | 0.40 | 0.92 | 0.19 | 0.09 | 0.13 | 0.19 | 0.23 | 0.11 | 0.10 | 0.18 | 0.14 | 0.25 | 0.24 | 0.25 | 0.34 | 0.23 | 0.57 | 0.31 | 0.19 | 0.25 |
| 6          | 452        | 0.15 | 0.30 | 0.52 | 0.37 | 0.85 | 0.17 | 0.08 | 0.12 | 0.18 | 0.21 | 0.11 | 0.09 | 0.17 | 0.13 | 0.23 | 0.22 | 0.23 | 0.32 | 0.21 | 0.53 | 0.29 | 0.18 | 0.23 |
| 7          | 741        | 0.24 | 0.49 | 0.85 | 0.61 | 1.40 | 0.28 | 0.13 | 0.20 | 0.29 | 0.35 | 0.17 | 0.15 | 0.28 | 0.22 | 0.38 | 0.37 | 0.38 | 0.53 | 0.35 | 0.87 | 0.48 | 0.30 | 0.38 |
| 8          | 377        | 0.12 | 0.25 | 0.43 | 0.31 | 0.71 | 0.14 | 0.07 | 0.10 | 0.15 | 0.18 | 0.09 | 0.07 | 0.14 | 0.11 | 0.19 | 0.19 | 0.19 | 0.27 | 0.18 | 0.45 | 0.24 | 0.15 | 0.20 |
| 9          | 431        | 0.14 | 0.29 | 0.50 | 0.35 | 0.81 | 0.17 | 0.08 | 0.12 | 0.17 | 0.20 | 0.10 | 0.09 | 0.16 | 0.13 | 0.22 | 0.21 | 0.22 | 0.31 | 0.20 | 0.51 | 0.28 | 0.17 | 0.22 |
| 10         | 248        | 0.08 | 0.17 | 0.29 | 0.20 | 0.47 | 0.10 | 0.04 | 0.07 | 0.10 | 0.12 | 0.06 | 0.05 | 0.09 | 0.07 | 0.13 | 0.12 | 0.13 | 0.18 | 0.12 | 0.29 | 0.16 | 0.10 | 0.13 |
| 11         | 262        | 0.08 | 0.18 | 0.30 | 0.21 | 0.49 | 0.10 | 0.05 | 0.07 | 0.10 | 0.12 | 0.06 | 0.05 | 0.10 | 0.08 | 0.14 | 0.13 | 0.13 | 0.19 | 0.12 | 0.31 | 0.17 | 0.11 | 0.14 |

| mod-S-2R |            | TiO2 |      |      |      |      |      |      |      |      |      |      |      |      |      |      |      |      |      |      |      |      |      |      |
|----------|------------|------|------|------|------|------|------|------|------|------|------|------|------|------|------|------|------|------|------|------|------|------|------|------|
| Exp      |            | 1    | 2    | 3    | 4    | 5    | 6    | 7    | 8    | 9    | 10   | 11   | 12   | 13   | 14   | 15   | 16   | 17   | 18   | 19   | 20   | 21   | 22   | 23   |
|          | <b>pH8</b> | 1118 | 972  | 429  | 1196 | 461  | 741  | 3568 | 2850 | 689  | 2640 | 2712 | 2047 | 1655 | 1499 | 904  | 980  | 892  | 645  | 976  | 340  | 932  | 1058 | 1123 |
| 1        | 504        | 0.45 | 0.52 | 1.17 | 0.42 | 1.09 | 0.68 | 0.14 | 0.18 | 0.73 | 0.19 | 0.19 | 0.25 | 0.30 | 0.34 | 0.56 | 0.51 | 0.57 | 0.78 | 0.52 | 1.48 | 0.54 | 0.48 | 0.45 |
| 2        | 202        | 0.18 | 0.21 | 0.47 | 0.17 | 0.44 | 0.27 | 0.06 | 0.07 | 0.29 | 0.08 | 0.07 | 0.10 | 0.12 | 0.13 | 0.22 | 0.21 | 0.23 | 0.31 | 0.21 | 0.59 | 0.22 | 0.19 | 0.18 |
| 3        | 28         | 0.03 | 0.03 | 0.07 | 0.02 | 0.06 | 0.04 | 0.01 | 0.01 | 0.04 | 0.01 | 0.01 | 0.01 | 0.02 | 0.02 | 0.03 | 0.03 | 0.03 | 0.04 | 0.03 | 0.08 | 0.03 | 0.03 | 0.02 |
| 4        | 367        | 0.33 | 0.38 | 0.86 | 0.31 | 0.80 | 0.50 | 0.10 | 0.13 | 0.53 | 0.14 | 0.14 | 0.18 | 0.22 | 0.24 | 0.41 | 0.37 | 0.41 | 0.57 | 0.38 | 1.08 | 0.39 | 0.35 | 0.33 |
| 5        | 312        | 0.28 | 0.32 | 0.73 | 0.26 | 0.68 | 0.42 | 0.09 | 0.11 | 0.45 | 0.12 | 0.12 | 0.15 | 0.19 | 0.21 | 0.35 | 0.32 | 0.35 | 0.48 | 0.32 | 0.92 | 0.33 | 0.29 | 0.28 |
| 6        | 145        | 0.13 | 0.15 | 0.34 | 0.12 | 0.31 | 0.20 | 0.04 | 0.05 | 0.21 | 0.05 | 0.05 | 0.07 | 0.09 | 0.10 | 0.16 | 0.15 | 0.16 | 0.22 | 0.15 | 0.43 | 0.16 | 0.14 | 0.13 |
| 7        | 482        | 0.43 | 0.50 | 1.12 | 0.40 | 1.05 | 0.65 | 0.14 | 0.17 | 0.70 | 0.18 | 0.18 | 0.24 | 0.29 | 0.32 | 0.53 | 0.49 | 0.54 | 0.75 | 0.49 | 1.42 | 0.52 | 0.46 | 0.43 |
| 8        | 183        | 0.16 | 0.19 | 0.43 | 0.15 | 0.40 | 0.25 | 0.05 | 0.06 | 0.27 | 0.07 | 0.07 | 0.09 | 0.11 | 0.12 | 0.20 | 0.19 | 0.21 | 0.28 | 0.19 | 0.54 | 0.20 | 0.17 | 0.16 |
| 9        | 158        | 0.14 | 0.16 | 0.37 | 0.13 | 0.34 | 0.21 | 0.04 | 0.06 | 0.23 | 0.06 | 0.06 | 0.08 | 0.10 | 0.11 | 0.17 | 0.16 | 0.18 | 0.24 | 0.16 | 0.46 | 0.17 | 0.15 | 0.14 |
| 10       |            |      |      |      |      |      |      |      |      |      |      |      |      |      |      |      |      |      |      |      |      |      |      |      |
| 11       | 185        | 0.17 | 0.19 | 0.43 | 0.15 | 0.40 | 0.25 | 0.05 | 0.06 | 0.27 | 0.07 | 0.07 | 0.09 | 0.11 | 0.12 | 0.20 | 0.19 | 0.21 | 0.29 | 0.19 | 0.54 | 0.20 | 0.17 | 0.16 |

| mod-Y-R |            | TiO2 |      |      |      |      |      |       |      |      |      |       |      |      |      |      |      |      |      |      |      |      |      |      |
|---------|------------|------|------|------|------|------|------|-------|------|------|------|-------|------|------|------|------|------|------|------|------|------|------|------|------|
| Exp     |            | 1    | 2    | 3    | 4    | 5    | 6    | 7     | 8    | 9    | 10   | 11    | 12   | 13   | 14   | 15   | 16   | 17   | 18   | 19   | 20   | 21   | 22   | 23   |
|         | <b>pH8</b> | 4080 | 3370 | 2735 | 2482 | 1245 | 4347 | 12181 | 7000 | 6227 | 4632 | 11499 | 9804 | 8280 | 7932 | 3642 | 3272 | 3556 | 2655 | 4093 | 1921 | 3230 | 3189 | 3698 |
| 1       | 1034       | 0.25 | 0.31 | 0.38 | 0.42 | 0.83 | 0.24 | 0.08  | 0.15 | 0.17 | 0.22 | 0.09  | 0.11 | 0.12 | 0.13 | 0.28 | 0.32 | 0.29 | 0.39 | 0.25 | 0.54 | 0.32 | 0.32 | 0.28 |
| 2       | 687        | 0.17 | 0.20 | 0.25 | 0.28 | 0.55 | 0.16 | 0.06  | 0.10 | 0.11 | 0.15 | 0.06  | 0.07 | 0.08 | 0.09 | 0.19 | 0.21 | 0.19 | 0.26 | 0.17 | 0.36 | 0.21 | 0.22 | 0.19 |
| 3       | 547        | 0.13 | 0.16 | 0.20 | 0.22 | 0.44 | 0.13 | 0.04  | 0.08 | 0.09 | 0.12 | 0.05  | 0.06 | 0.07 | 0.07 | 0.15 | 0.17 | 0.15 | 0.21 | 0.13 | 0.28 | 0.17 | 0.17 | 0.15 |
| 4       | 1412       | 0.35 | 0.42 | 0.52 | 0.57 | 1.13 | 0.32 | 0.12  | 0.20 | 0.23 | 0.30 | 0.12  | 0.14 | 0.17 | 0.18 | 0.39 | 0.43 | 0.40 | 0.53 | 0.34 | 0.74 | 0.44 | 0.44 | 0.38 |
| 5       | 1077       | 0.26 | 0.32 | 0.39 | 0.43 | 0.87 | 0.25 | 0.09  | 0.15 | 0.17 | 0.23 | 0.09  | 0.11 | 0.13 | 0.14 | 0.30 | 0.33 | 0.30 | 0.41 | 0.26 | 0.56 | 0.33 | 0.34 | 0.29 |
| 6       | 781        | 0.19 | 0.23 | 0.29 | 0.31 | 0.63 | 0.18 | 0.06  | 0.11 | 0.13 | 0.17 | 0.07  | 0.08 | 0.09 | 0.10 | 0.21 | 0.24 | 0.22 | 0.29 | 0.19 | 0.41 | 0.24 | 0.24 | 0.21 |
| 7       | 1194       | 0.29 | 0.35 | 0.44 | 0.48 | 0.96 | 0.27 | 0.10  | 0.17 | 0.19 | 0.26 | 0.10  | 0.12 | 0.14 | 0.15 | 0.33 | 0.36 | 0.34 | 0.45 | 0.29 | 0.62 | 0.37 | 0.37 | 0.32 |
| 8       | 714        | 0.18 | 0.21 | 0.26 | 0.29 | 0.57 | 0.16 | 0.06  | 0.10 | 0.11 | 0.15 | 0.06  | 0.07 | 0.09 | 0.09 | 0.20 | 0.22 | 0.20 | 0.27 | 0.17 | 0.37 | 0.22 | 0.22 | 0.19 |
| 9       | 894        | 0.22 | 0.27 | 0.33 | 0.36 | 0.72 | 0.21 | 0.07  | 0.13 | 0.14 | 0.19 | 0.08  | 0.09 | 0.11 | 0.11 | 0.25 | 0.27 | 0.25 | 0.34 | 0.22 | 0.47 | 0.28 | 0.28 | 0.24 |
| 10      | 439        | 0.11 | 0.13 | 0.16 | 0.18 | 0.35 | 0.10 | 0.04  | 0.06 | 0.07 | 0.09 | 0.04  | 0.04 | 0.05 | 0.06 | 0.12 | 0.13 | 0.12 | 0.17 | 0.11 | 0.23 | 0.14 | 0.14 | 0.12 |
| 11      | 514        | 0.13 | 0.15 | 0.19 | 0.21 | 0.41 | 0.12 | 0.04  | 0.07 | 0.08 | 0.11 | 0.04  | 0.05 | 0.06 | 0.06 | 0.14 | 0.16 | 0.14 | 0.19 | 0.13 | 0.27 | 0.16 | 0.16 | 0.14 |

pH 8 / TiO2 signal ratios

|    | mod-Y-2R | TiO2 |      |      |      |      |      |      |      |      |      |      |      |      |      |      |      |      |      |      |      |      |      |      |
|----|----------|------|------|------|------|------|------|------|------|------|------|------|------|------|------|------|------|------|------|------|------|------|------|------|
|    | Exp      | 1    | 2    | 3    | 4    | 5    | 6    | 7    | 8    | 9    | 10   | 11   | 12   | 13   | 14   | 15   | 16   | 17   | 18   |      |      |      |      |      |
|    | pH8      | 1086 | 1755 | 788  | 1712 | 665  | 797  | 6507 | 5412 | 1292 | 5398 | 6440 | 3752 | 3483 | 2954 | 1660 | 1625 | 1502 | 1171 | 1847 | 728  | 1716 | 1275 | 2125 |
| 1  | 678      | 0.62 | 0.39 | 0.86 | 0.40 | 1.02 | 0.85 | 0.10 | 0.13 | 0.52 | 0.13 | 0.11 | 0.18 | 0.19 | 0.23 | 0.41 | 0.42 | 0.45 | 0.58 | 0.37 | 0.93 | 0.40 | 0.53 | 0.32 |
| 2  | 305      | 0.28 | 0.17 | 0.39 | 0.18 | 0.46 | 0.38 | 0.05 | 0.06 | 0.24 | 0.06 | 0.05 | 0.08 | 0.09 | 0.10 | 0.18 | 0.19 | 0.20 | 0.26 | 0.17 | 0.42 | 0.18 | 0.24 | 0.14 |
| 3  | 39       | 0.04 | 0.02 | 0.05 | 0.02 | 0.06 | 0.05 | 0.01 | 0.01 | 0.03 | 0.01 | 0.01 | 0.01 | 0.01 | 0.01 | 0.02 | 0.02 | 0.03 | 0.03 | 0.02 | 0.05 | 0.02 | 0.03 | 0.02 |
| 4  | 561      | 0.52 | 0.32 | 0.71 | 0.33 | 0.84 | 0.70 | 0.09 | 0.10 | 0.43 | 0.10 | 0.09 | 0.15 | 0.16 | 0.19 | 0.34 | 0.35 | 0.37 | 0.48 | 0.30 | 0.77 | 0.33 | 0.44 | 0.26 |
| 5  | 578      | 0.53 | 0.33 | 0.73 | 0.34 | 0.87 | 0.73 | 0.09 | 0.11 | 0.45 | 0.11 | 0.09 | 0.15 | 0.17 | 0.20 | 0.35 | 0.36 | 0.38 | 0.49 | 0.31 | 0.79 | 0.34 | 0.45 | 0.27 |
| 6  | 180      | 0.17 | 0.10 | 0.23 | 0.11 | 0.27 | 0.23 | 0.03 | 0.03 | 0.14 | 0.03 | 0.03 | 0.05 | 0.05 | 0.06 | 0.11 | 0.11 | 0.12 | 0.15 | 0.10 | 0.25 | 0.10 | 0.14 | 0.08 |
| 7  | 692      | 0.64 | 0.39 | 0.88 | 0.40 | 1.04 | 0.87 | 0.11 | 0.13 | 0.54 | 0.13 | 0.11 | 0.18 | 0.20 | 0.23 | 0.42 | 0.43 | 0.46 | 0.59 | 0.37 | 0.95 | 0.40 | 0.54 | 0.33 |
| 8  | 321      | 0.30 | 0.18 | 0.41 | 0.19 | 0.48 | 0.40 | 0.05 | 0.06 | 0.25 | 0.06 | 0.05 | 0.09 | 0.09 | 0.11 | 0.19 | 0.20 | 0.21 | 0.27 | 0.17 | 0.44 | 0.19 | 0.25 | 0.15 |
| 9  | 218      | 0.20 | 0.12 | 0.28 | 0.13 | 0.33 | 0.27 | 0.03 | 0.04 | 0.17 | 0.04 | 0.03 | 0.06 | 0.06 | 0.07 | 0.13 | 0.13 | 0.15 | 0.19 | 0.12 | 0.30 | 0.13 | 0.17 | 0.10 |
| 10 | 153      | 0.14 | 0.09 | 0.19 | 0.09 | 0.23 | 0.19 | 0.02 | 0.03 | 0.12 | 0.03 | 0.02 | 0.04 | 0.04 | 0.05 | 0.09 | 0.09 | 0.10 | 0.13 | 0.08 | 0.21 | 0.09 | 0.12 | 0.07 |
| 11 | 363      | 0.33 | 0.21 | 0.46 | 0.21 | 0.55 | 0.46 | 0.06 | 0.07 | 0.28 | 0.07 | 0.06 | 0.10 | 0.10 | 0.12 | 0.22 | 0.22 | 0.24 | 0.31 | 0.20 | 0.50 | 0.21 | 0.28 | 0.17 |

Significance test

pH 8/TiO2 signal area ratio

|          | Average | SEM  |
|----------|---------|------|
| mod-S-R  | 0.26    | 0.01 |
| mod-S-2R | 0.28    | 0.02 |
| mod-Y-R  | 0.23    | 0.01 |
| mod-Y-2R | 0.24    | 0.01 |

Paired t-test

TiO2 vs pH 8

p-values for all pairs

|          | mod-S-R  | mod-S-2R | mod-Y-R  | mod-Y-2R |
|----------|----------|----------|----------|----------|
| mod-S-R  |          | 0.660    | 5.04E-08 | 0.065    |
| mod-S-2R | 0.660    |          | 0.002    | 0.001    |
| mod-Y-R  | 5.04E-08 | 0.002    |          | 0.242    |
| mod-Y-2R | 0.065    | 0.001    | 0.242    |          |

Significant difference between peptides

Not significant difference between peptides



# Appendix D

Raw data and significance tests

TiO<sub>2</sub>: non-washed vs. washed with buffer pH 9

## Raw data (signal area)

**TiO2**

|         | S-R      | S-2R     | Y-R      | Y-2R     |
|---------|----------|----------|----------|----------|
| 1       | 3102     | 1118     | 4080     | 1086     |
| 2       | 1497     | 972      | 3370     | 1755     |
| 3       | 869      | 429      | 2735     | 788      |
| 4       | 1219     | 1196     | 2482     | 1712     |
| 5       | 530      | 461      | 1245     | 665      |
| 6       | 2603     | 741      | 4347     | 797      |
| 7       | 5549     | 3568     | 12181    | 6507     |
| 8       | 3722     | 2850     | 7000     | 5412     |
| 9       | 2580     | 689      | 6227     | 1292     |
| 10      | 2118     | 2640     | 4632     | 5398     |
| 11      | 4258     | 2712     | 11499    | 6440     |
| 12      | 5030     | 2047     | 9804     | 3752     |
| 13      | 2657     | 1655     | 8280     | 3483     |
| 14      | 3409     | 1499     | 7932     | 2954     |
| 15      | 1939     | 904      | 3642     | 1660     |
| 16      | 2029     | 980      | 3272     | 1625     |
| 17      | 1957     | 892      | 3556     | 1502     |
| 18      | 1406     | 645      | 2655     | 1171     |
| 19      | 2122     | 976      | 4093     | 1847     |
| 20      | 847      | 340      | 1921     | 728      |
| 21      | 1546     | 932      | 3230     | 1716     |
| 22      | 2495     | 1058     | 3189     | 1275     |
| 23      | 1928     | 1123     | 3698     | 2125     |
| Average | 2409.217 | 1322.913 | 5003.043 | 2421.304 |
| Stdev   | 1293.283 | 864.8099 | 3031.676 | 1845.683 |
| SEM     | 269.6681 | 180.3253 | 632.1481 | 384.8516 |

**pH 9**

|         | S-R      | S-2R     | Y-R      | Y-2R     |
|---------|----------|----------|----------|----------|
| 1       | 83       |          | 118      | 29       |
| 2       | 72       |          | 47       | 18       |
| 3       | 61       |          | 47       |          |
| 4       | 55       |          | 47       |          |
| 5       | 256      | 51       | 266      |          |
| 6       | 107      |          | 82       |          |
| 7       | 590      |          | 861      |          |
| 8       | 20       |          | 52       |          |
| 9       | 94       | 25       | 116      | 22       |
| Average | 148.6667 | 38       | 181.7778 | 23       |
| Stdev   | 178.2638 | 18.38478 | 264.1315 | 5.567764 |
| SEM     | 59.42128 | 13       | 88.04383 | 3.21455  |

| mod-S-R    |      | TiO2  |       |       |       |       |       |       |       |       |       |       |       |       |       |       |       |       |       |       |       |       |       |       |
|------------|------|-------|-------|-------|-------|-------|-------|-------|-------|-------|-------|-------|-------|-------|-------|-------|-------|-------|-------|-------|-------|-------|-------|-------|
| Exp        | pH 9 | 1     | 2     | 3     | 4     | 5     | 6     | 7     | 8     | 9     | 10    | 11    | 12    | 13    | 14    | 15    | 16    | 17    | 18    | 19    | 20    | 21    | 22    | 23    |
| Experiment |      | 3102  | 1497  | 869   | 1219  | 530   | 2603  | 5549  | 3722  | 2580  | 2118  | 4258  | 5030  | 2657  | 3409  | 1939  | 2029  | 1957  | 1406  | 2122  | 847   | 1546  | 2495  | 1928  |
| 1          | 83   | 0.027 | 0.055 | 0.096 | 0.068 | 0.157 | 0.032 | 0.015 | 0.022 | 0.032 | 0.039 | 0.019 | 0.017 | 0.031 | 0.024 | 0.043 | 0.041 | 0.042 | 0.059 | 0.039 | 0.098 | 0.054 | 0.033 | 0.043 |
| 2          | 72   | 0.023 | 0.048 | 0.083 | 0.059 | 0.136 | 0.028 | 0.013 | 0.019 | 0.028 | 0.034 | 0.017 | 0.014 | 0.027 | 0.021 | 0.037 | 0.035 | 0.037 | 0.051 | 0.034 | 0.085 | 0.047 | 0.029 | 0.037 |
| 3          | 61   | 0.020 | 0.041 | 0.070 | 0.050 | 0.115 | 0.023 | 0.011 | 0.016 | 0.024 | 0.029 | 0.014 | 0.012 | 0.023 | 0.018 | 0.031 | 0.030 | 0.031 | 0.043 | 0.029 | 0.072 | 0.039 | 0.024 | 0.032 |
| 4          | 55   | 0.018 | 0.037 | 0.063 | 0.045 | 0.104 | 0.021 | 0.010 | 0.015 | 0.021 | 0.026 | 0.013 | 0.011 | 0.021 | 0.016 | 0.028 | 0.027 | 0.028 | 0.039 | 0.026 | 0.065 | 0.036 | 0.022 | 0.029 |
| 5          | 256  | 0.083 | 0.171 | 0.295 | 0.210 | 0.483 | 0.098 | 0.046 | 0.069 | 0.099 | 0.121 | 0.060 | 0.051 | 0.096 | 0.075 | 0.132 | 0.126 | 0.131 | 0.182 | 0.121 | 0.302 | 0.166 | 0.103 | 0.133 |
| 6          | 107  | 0.034 | 0.071 | 0.123 | 0.088 | 0.202 | 0.041 | 0.019 | 0.029 | 0.041 | 0.051 | 0.025 | 0.021 | 0.040 | 0.031 | 0.055 | 0.053 | 0.055 | 0.076 | 0.050 | 0.126 | 0.069 | 0.043 | 0.055 |
| 7          | 590  | 0.190 | 0.394 | 0.679 | 0.484 | 1.113 | 0.227 | 0.106 | 0.159 | 0.229 | 0.279 | 0.139 | 0.117 | 0.222 | 0.173 | 0.304 | 0.291 | 0.301 | 0.420 | 0.278 | 0.697 | 0.382 | 0.236 | 0.306 |
| 8          | 20   | 0.006 | 0.013 | 0.023 | 0.016 | 0.038 | 0.008 | 0.004 | 0.005 | 0.008 | 0.009 | 0.005 | 0.004 | 0.008 | 0.006 | 0.010 | 0.010 | 0.010 | 0.014 | 0.009 | 0.024 | 0.013 | 0.008 | 0.010 |
| 9          | 94   | 0.030 | 0.063 | 0.108 | 0.077 | 0.177 | 0.036 | 0.017 | 0.025 | 0.036 | 0.044 | 0.022 | 0.019 | 0.035 | 0.028 | 0.048 | 0.046 | 0.048 | 0.067 | 0.044 | 0.111 | 0.061 | 0.038 | 0.049 |

| mod-S-2R |      | TiO2  |       |       |       |       |       |       |       |       |       |       |       |       |       |       |       |       |       |       |       |       |       |       |
|----------|------|-------|-------|-------|-------|-------|-------|-------|-------|-------|-------|-------|-------|-------|-------|-------|-------|-------|-------|-------|-------|-------|-------|-------|
| Exp      | pH 9 | 1     | 2     | 3     | 4     | 5     | 6     | 7     | 8     | 9     | 10    | 11    | 12    | 13    | 14    | 15    | 16    | 17    | 18    | 19    | 20    | 21    | 22    | 23    |
| 1        |      | 1118  | 972   | 429   | 1196  | 461   | 741   | 3568  | 2850  | 689   | 2640  | 2712  | 2047  | 1655  | 1499  | 904   | 980   | 892   | 645   | 976   | 340   | 932   | 1058  | 1123  |
| 2        |      |       |       |       |       |       |       |       |       |       |       |       |       |       |       |       |       |       |       |       |       |       |       |       |
| 3        |      |       |       |       |       |       |       |       |       |       |       |       |       |       |       |       |       |       |       |       |       |       |       |       |
| 4        |      |       |       |       |       |       |       |       |       |       |       |       |       |       |       |       |       |       |       |       |       |       |       |       |
| 5        | 51   | 0.046 | 0.052 | 0.119 | 0.043 | 0.111 | 0.069 | 0.014 | 0.018 | 0.074 | 0.019 | 0.019 | 0.025 | 0.031 | 0.034 | 0.056 | 0.052 | 0.057 | 0.079 | 0.052 | 0.150 | 0.055 | 0.048 | 0.045 |
| 6        |      |       |       |       |       |       |       |       |       |       |       |       |       |       |       |       |       |       |       |       |       |       |       |       |
| 7        |      |       |       |       |       |       |       |       |       |       |       |       |       |       |       |       |       |       |       |       |       |       |       |       |
| 8        |      |       |       |       |       |       |       |       |       |       |       |       |       |       |       |       |       |       |       |       |       |       |       |       |
| 9        | 25   | 0.022 | 0.026 | 0.058 | 0.021 | 0.054 | 0.034 | 0.007 | 0.009 | 0.036 | 0.009 | 0.009 | 0.012 | 0.015 | 0.017 | 0.028 | 0.026 | 0.028 | 0.039 | 0.026 | 0.074 | 0.027 | 0.024 | 0.022 |

| mod-Y-R |      | TiO2  |       |       |       |       |       |       |       |       |       |       |       |       |       |       |       |       |       |       |       |       |       |       |
|---------|------|-------|-------|-------|-------|-------|-------|-------|-------|-------|-------|-------|-------|-------|-------|-------|-------|-------|-------|-------|-------|-------|-------|-------|
| Exp     | pH 9 | 1     | 2     | 3     | 4     | 5     | 6     | 7     | 8     | 9     | 10    | 11    | 12    | 13    | 14    | 15    | 16    | 17    | 18    | 19    | 20    | 21    | 22    | 23    |
| 1       |      | 4080  | 3370  | 2735  | 2482  | 1245  | 4347  | 12181 | 7000  | 6227  | 4632  | 11499 | 9804  | 8280  | 7932  | 3642  | 3272  | 3556  | 2655  | 4093  | 1921  | 3230  | 3189  | 3698  |
| 2       | 118  | 0.029 | 0.035 | 0.043 | 0.048 | 0.095 | 0.027 | 0.010 | 0.017 | 0.019 | 0.025 | 0.010 | 0.012 | 0.014 | 0.015 | 0.032 | 0.036 | 0.033 | 0.044 | 0.029 | 0.061 | 0.037 | 0.037 | 0.032 |
| 3       | 47   | 0.012 | 0.014 | 0.017 | 0.019 | 0.038 | 0.011 | 0.004 | 0.007 | 0.008 | 0.010 | 0.004 | 0.005 | 0.006 | 0.006 | 0.013 | 0.014 | 0.013 | 0.018 | 0.011 | 0.024 | 0.015 | 0.015 | 0.013 |
| 4       | 47   | 0.012 | 0.014 | 0.017 | 0.019 | 0.038 | 0.011 | 0.004 | 0.007 | 0.008 | 0.010 | 0.004 | 0.005 | 0.006 | 0.006 | 0.013 | 0.014 | 0.013 | 0.018 | 0.011 | 0.024 | 0.015 | 0.015 | 0.013 |
| 5       | 266  | 0.065 | 0.079 | 0.097 | 0.107 | 0.214 | 0.061 | 0.022 | 0.038 | 0.043 | 0.057 | 0.023 | 0.027 | 0.032 | 0.034 | 0.073 | 0.081 | 0.075 | 0.100 | 0.065 | 0.138 | 0.082 | 0.083 | 0.072 |
| 6       | 82   | 0.020 | 0.024 | 0.030 | 0.033 | 0.066 | 0.019 | 0.007 | 0.012 | 0.013 | 0.018 | 0.007 | 0.008 | 0.010 | 0.010 | 0.023 | 0.025 | 0.023 | 0.031 | 0.020 | 0.043 | 0.025 | 0.026 | 0.022 |
| 7       | 861  | 0.211 | 0.255 | 0.315 | 0.347 | 0.692 | 0.198 | 0.071 | 0.123 | 0.138 | 0.186 | 0.075 | 0.088 | 0.104 | 0.109 | 0.236 | 0.263 | 0.242 | 0.324 | 0.210 | 0.448 | 0.267 | 0.270 | 0.233 |
| 8       | 52   | 0.013 | 0.015 | 0.019 | 0.021 | 0.042 | 0.012 | 0.004 | 0.007 | 0.008 | 0.011 | 0.005 | 0.005 | 0.006 | 0.007 | 0.014 | 0.016 | 0.015 | 0.020 | 0.013 | 0.027 | 0.016 | 0.016 | 0.014 |
| 9       | 116  | 0.028 | 0.034 | 0.042 | 0.047 | 0.093 | 0.027 | 0.010 | 0.017 | 0.019 | 0.025 | 0.010 | 0.012 | 0.014 | 0.015 | 0.032 | 0.035 | 0.033 | 0.044 | 0.028 | 0.060 | 0.036 | 0.036 | 0.031 |

| mod-Y-2R |      | TiO2 |       |       |       |       |       |       |       |       |       |       |       |       |       |       |       |       |       |       |       |       |       |       |
|----------|------|------|-------|-------|-------|-------|-------|-------|-------|-------|-------|-------|-------|-------|-------|-------|-------|-------|-------|-------|-------|-------|-------|-------|
| Exp      | pH 9 | 1    | 2     | 3     | 4     | 5     | 6     | 7     | 8     | 9     | 10    | 11    | 12    | 13    | 14    | 15    | 16    | 17    | 18    |       |       |       |       |       |
| 1        | 29   | 1086 | 1755  | 788   | 1712  | 665   | 797   | 6507  | 5412  | 1292  | 5398  | 6440  | 3752  | 3483  | 2954  | 1660  | 1625  | 1502  | 1171  | 1847  | 728   | 1716  | 1275  | 2125  |
| 2        | 18   | 0.03 | 0.017 | 0.037 | 0.017 | 0.044 | 0.036 | 0.004 | 0.005 | 0.022 | 0.005 | 0.005 | 0.008 | 0.008 | 0.010 | 0.017 | 0.018 | 0.019 | 0.025 | 0.016 | 0.040 | 0.017 | 0.023 | 0.014 |
| 3        |      |      |       |       |       |       |       |       |       |       |       |       |       |       |       |       |       |       |       |       |       |       |       |       |
| 4        |      |      |       |       |       |       |       |       |       |       |       |       |       |       |       |       |       |       |       |       |       |       |       |       |
| 5        |      |      |       |       |       |       |       |       |       |       |       |       |       |       |       |       |       |       |       |       |       |       |       |       |
| 6        |      |      |       |       |       |       |       |       |       |       |       |       |       |       |       |       |       |       |       |       |       |       |       |       |
| 7        |      |      |       |       |       |       |       |       |       |       |       |       |       |       |       |       |       |       |       |       |       |       |       |       |
| 8        |      |      |       |       |       |       |       |       |       |       |       |       |       |       |       |       |       |       |       |       |       |       |       |       |
| 9        | 22   | 0.02 | 0.013 | 0.028 | 0.013 | 0.033 | 0.028 | 0.003 | 0.004 | 0.017 | 0.004 | 0.003 | 0.006 | 0.006 | 0.007 | 0.013 | 0.014 | 0.015 | 0.019 | 0.012 | 0.030 | 0.013 | 0.017 | 0.010 |

Significance test

pH 9/TiO2 signal area ratio

|          | Average | SEM  |
|----------|---------|------|
| mod-S-R  | 0.08    | 0.01 |
| mod-S-2R | 0.04    | 0.00 |
| mod-Y-R  | 0.05    | 0.01 |
| mod-Y-2R | 0.01    | 0.00 |

Paired t-test

TiO2 vs pH 9

p-values for all pairs

|          | mod-S-R  | mod-S-2R | mod-Y-R  | mod-Y-2R |
|----------|----------|----------|----------|----------|
| mod-S-R  |          | 1.88E-07 | 9.33E-18 | 3.12E-15 |
| mod-S-2R | 1.88E-07 |          | 0.002    | 1.60E-06 |
| mod-Y-R  | 9.33E-18 | 0.002    |          | 1.41E-09 |
| mod-Y-2R | 3.12E-15 | 1.60E-06 | 1.41E-09 |          |

Significant difference between peptides

Not significant difference between peptides

# Appendix E

Raw data and significance tests

TiO<sub>2</sub>: non-washed vs. washed with buffer pH 1.3

Raw data (signal areas)

**TiO2**

|         | S-R      | S-2R     | Y-R      | Y-2R     |
|---------|----------|----------|----------|----------|
| 1       | 3102     | 1118     | 4080     | 1086     |
| 2       | 1497     | 972      | 3370     | 1755     |
| 3       | 869      | 429      | 2735     | 788      |
| 4       | 1219     | 1196     | 2482     | 1712     |
| 5       | 530      | 461      | 1245     | 665      |
| 6       | 2603     | 741      | 4347     | 797      |
| 7       | 5549     | 3568     | 12181    | 6507     |
| 8       | 3722     | 2850     | 7000     | 5412     |
| 9       | 2580     | 689      | 6227     | 1292     |
| 10      | 2118     | 2640     | 4632     | 5398     |
| 11      | 4258     | 2712     | 11499    | 6440     |
| 12      | 5030     | 2047     | 9804     | 3752     |
| 13      | 2657     | 1655     | 8280     | 3483     |
| 14      | 3409     | 1499     | 7932     | 2954     |
| 15      | 1939     | 904      | 3642     | 1660     |
| 16      | 2029     | 980      | 3272     | 1625     |
| 17      | 1957     | 892      | 3556     | 1502     |
| 18      | 1406     | 645      | 2655     | 1171     |
| 19      | 2122     | 976      | 4093     | 1847     |
| 20      | 847      | 340      | 1921     | 728      |
| 21      | 1546     | 932      | 3230     | 1716     |
| 22      | 2495     | 1058     | 3189     | 1275     |
| 23      | 1928     | 1123     | 3698     | 2125     |
| Average | 2409.217 | 1322.913 | 5003.043 | 2421.304 |
| Stdev   | 1293.283 | 864.8099 | 3031.676 | 1845.683 |
| SEM     | 269.6681 | 180.3253 | 632.1481 | 384.8516 |

**pH 1.33**

|         | S-R      | S-2R       | Y-R      | Y-2R     |
|---------|----------|------------|----------|----------|
| 1       | 6429     | 4025       | 13255    | 8608     |
| 2       | 6282     | 3700       | 13307    | 7324     |
| 3       | 3881     | 2585       | 8589     | 6237     |
| 4       | 4391     | 2306       | 9858     | 5271     |
| 5       | 10090    | 3904       | 16341    | 5777     |
| 6       | 6661     | 3254       | 12917    | 6375     |
| 7       | 5211     | 3289       | 11946    | 7947     |
| 8       | 5758     | 2915       | 11765    | 5248     |
| 9       | 4347     | 2658       | 9402     | 5936     |
| 10      | 7507     | 3047       | 13710    | 6848     |
| 11      | 5869     | 2179       | 11426    | 4613     |
| 12      | 2341     | 981        | 5786     | 3051     |
| 13      | 2780     | 580        | 9788     | 1750     |
| 14      | 2014     | 1081       | 5335     | 3244     |
| 15      | 1489     | 619        | 6093     | 1949     |
| 16      | 1308     | 297        | 4904     | 679      |
| 17      | 2803     | 469        | 7240     | 1097     |
| 18      | 1013     | 299        | 2925     | 445      |
| 19      | 1172     | 336        | 2974     | 1115     |
| 20      | 3718     | 688        | 8937     | 1852     |
| 21      | 1857     | 492        | 5194     | 1338     |
| 22      | 2261     | 858        | 6044     | 2221     |
| 23      | 4704     | 1423       | 10057    | 2666     |
| 24      | 3097     | 1285       | 6715     | 2754     |
| 25      | 229      | 14         | 568      | 28       |
| 26      | 335      | 113        | 551      | 102      |
| 27      | 230      | 17         | 1004     | 21       |
| 28      | 112      | 20         | 420      | 26       |
| 29      | 173      | 23         | 250      | 28       |
| 30      | 42       | 6          | 108      | 1        |
| 31      | 175      | 35         | 258      | 85       |
| 32      | 251      | 81         | 799      | 156      |
| 33      | 312      | 63         | 717      | 144      |
| 34      | 202      | 19         | 381      | 20       |
| 35      | 400      | 39         | 244      | 45       |
| 36      | 54       | 1          | 146      | 1        |
| 37      | 7211     | 2072       | 16614    | 4466     |
| 38      | 1456     | 280        | 3858     | 1007     |
| 39      | 1361     | 433        | 6515     | 1189     |
| 40      | 2015     | 755        | 7267     | 2149     |
| 41      | 1462     | 829        | 5308     | 2628     |
| 42      | 1542     | 442        | 4544     | 1421     |
| 43      | 5441     | 1686       | 12388    | 4213     |
| 44      | 1943     | 1120       | 8599     | 2077     |
| 45      | 4410     | 1402       | 12065    | 4167     |
| 46      | 1702     | 545        | 5733     | 2239     |
| 47      | 1414     | 323        | 4857     | 1402     |
| 48      | 2616     | 564        | 5764     | 1407     |
| 49      | 3535     | 1297       | 8320     | 3168     |
| 50      | 2914     | 880        | 6533     | 2190     |
| 51      | 3417     | 997        | 8037     | 1548     |
| 52      | 594      | 357        | 2210     | 819      |
| 53      | 3628     | 1499       | 7830     | 2729     |
| 54      | 2784     | 460        | 5854     | 1213     |
| 55      | 2829     | 1122       | 7227     | 3273     |
| 56      | 4106     | 1180       | 9255     | 3137     |
| Average | 2783.536 | 1106.14286 | 6584.5   | 2525.786 |
| Stdev   | 2302.346 | 1125.01719 | 4496.22  | 2302.853 |
| SEM     | 307.664  | 150.336746 | 600.8327 | 307.7317 |

pH 1.3 / TiO2 signal ratios

|            |        | mod-S-R | TiO2 |       |      |       |      |      |      |      |      |      |      |      |      |      |      |      |      |      |       |      |      |      |      |
|------------|--------|---------|------|-------|------|-------|------|------|------|------|------|------|------|------|------|------|------|------|------|------|-------|------|------|------|------|
|            |        | Exp     | 1    | 2     | 3    | 4     | 5    | 6    | 7    | 8    | 9    | 10   | 11   | 12   | 13   | 14   | 15   | 16   | 17   | 18   | 19    | 20   | 21   | 22   | 23   |
| Experiment | pH 1.3 |         | 3102 | 1497  | 869  | 1219  | 530  | 2603 | 5549 | 3722 | 2580 | 2118 | 4258 | 5030 | 2657 | 3409 | 1939 | 2029 | 1957 | 1406 | 2122  | 847  | 1546 | 2495 | 1928 |
| 1          | 6429   | 2.07    | 4.29 | 7.40  | 5.27 | 12.13 | 2.47 | 1.16 | 1.73 | 2.49 | 3.04 | 1.51 | 1.28 | 2.42 | 1.89 | 3.32 | 3.17 | 3.29 | 4.57 | 3.03 | 7.59  | 4.16 | 2.58 | 3.33 |      |
| 2          | 6282   | 2.03    | 4.20 | 7.23  | 5.15 | 11.85 | 2.41 | 1.13 | 1.69 | 2.43 | 2.97 | 1.48 | 1.25 | 2.36 | 1.84 | 3.24 | 3.10 | 3.21 | 4.47 | 2.96 | 7.42  | 4.06 | 2.52 | 3.26 |      |
| 3          | 3881   | 1.25    | 2.59 | 4.47  | 3.18 | 7.32  | 1.49 | 0.70 | 1.04 | 1.50 | 1.83 | 0.91 | 0.77 | 1.46 | 1.14 | 2.00 | 1.91 | 1.98 | 2.76 | 1.83 | 4.58  | 2.51 | 1.56 | 2.01 |      |
| 4          | 4391   | 1.42    | 2.93 | 5.05  | 3.60 | 8.28  | 1.69 | 0.79 | 1.18 | 1.70 | 2.07 | 1.03 | 0.87 | 1.65 | 1.29 | 2.26 | 2.16 | 2.24 | 3.12 | 2.07 | 5.18  | 2.84 | 1.76 | 2.28 |      |
| 5          | 10090  | 3.25    | 6.74 | 11.61 | 8.28 | 19.04 | 3.88 | 1.82 | 2.71 | 3.91 | 4.76 | 2.37 | 2.01 | 3.80 | 2.96 | 5.20 | 4.97 | 5.16 | 7.18 | 4.75 | 11.91 | 6.53 | 4.04 | 5.23 |      |
| 6          | 6661   | 2.15    | 4.45 | 7.67  | 5.46 | 12.57 | 2.56 | 1.20 | 1.79 | 2.58 | 3.14 | 1.56 | 1.32 | 2.51 | 1.95 | 3.44 | 3.28 | 3.40 | 4.74 | 3.14 | 7.86  | 4.31 | 2.67 | 3.45 |      |
| 7          | 5211   | 1.68    | 3.48 | 6.00  | 4.27 | 9.83  | 2.00 | 0.94 | 1.40 | 2.02 | 2.46 | 1.22 | 1.04 | 1.96 | 1.53 | 2.69 | 2.57 | 2.66 | 3.71 | 2.46 | 6.15  | 3.37 | 2.09 | 2.70 |      |
| 8          | 5758   | 1.86    | 3.85 | 6.63  | 4.72 | 10.86 | 2.21 | 1.04 | 1.55 | 2.23 | 2.72 | 1.35 | 1.14 | 2.17 | 1.69 | 2.97 | 2.84 | 2.94 | 4.10 | 2.71 | 6.80  | 3.72 | 2.31 | 2.99 |      |
| 9          | 4347   | 1.40    | 2.90 | 5.00  | 3.57 | 8.20  | 1.67 | 0.78 | 1.17 | 1.68 | 2.05 | 1.02 | 0.86 | 1.64 | 1.28 | 2.24 | 2.14 | 2.22 | 3.09 | 2.05 | 5.13  | 2.81 | 1.74 | 2.25 |      |
| 10         | 7507   | 2.42    | 5.01 | 8.64  | 6.16 | 14.16 | 2.88 | 1.35 | 2.02 | 2.91 | 3.54 | 1.76 | 1.49 | 2.83 | 2.20 | 3.87 | 3.70 | 3.84 | 5.34 | 3.54 | 8.86  | 4.86 | 3.01 | 3.89 |      |
| 11         | 5869   | 1.89    | 3.92 | 6.75  | 4.81 | 11.07 | 2.25 | 1.06 | 1.58 | 2.27 | 2.77 | 1.38 | 1.17 | 2.21 | 1.72 | 3.03 | 2.89 | 3.00 | 4.17 | 2.77 | 6.93  | 3.80 | 2.35 | 3.04 |      |
| 12         | 2341   | 0.75    | 1.56 | 2.69  | 1.92 | 4.42  | 0.90 | 0.42 | 0.63 | 0.91 | 1.11 | 0.55 | 0.47 | 0.88 | 0.69 | 1.21 | 1.15 | 1.20 | 1.67 | 1.10 | 2.76  | 1.51 | 0.94 | 1.21 |      |
| 13         | 2780   | 0.90    | 1.86 | 3.20  | 2.28 | 5.25  | 1.07 | 0.50 | 0.75 | 1.08 | 1.31 | 0.65 | 0.55 | 1.05 | 0.82 | 1.43 | 1.37 | 1.42 | 1.98 | 1.31 | 3.28  | 1.80 | 1.11 | 1.44 |      |
| 14         | 2014   | 0.65    | 1.35 | 2.32  | 1.65 | 3.80  | 0.77 | 0.36 | 0.54 | 0.78 | 0.95 | 0.47 | 0.40 | 0.76 | 0.59 | 1.04 | 0.99 | 1.03 | 1.43 | 0.95 | 2.38  | 1.30 | 0.81 | 1.04 |      |
| 15         | 1489   | 0.48    | 0.99 | 1.71  | 1.22 | 2.81  | 0.57 | 0.27 | 0.40 | 0.58 | 0.70 | 0.35 | 0.30 | 0.56 | 0.44 | 0.77 | 0.73 | 0.76 | 1.06 | 0.70 | 1.76  | 0.96 | 0.60 | 0.77 |      |
| 16         | 1308   | 0.42    | 0.87 | 1.51  | 1.07 | 2.47  | 0.50 | 0.24 | 0.35 | 0.51 | 0.62 | 0.31 | 0.26 | 0.49 | 0.38 | 0.67 | 0.64 | 0.67 | 0.93 | 0.62 | 1.54  | 0.85 | 0.52 | 0.68 |      |
| 17         | 2803   | 0.90    | 1.87 | 3.23  | 2.30 | 5.29  | 1.08 | 0.51 | 0.75 | 1.09 | 1.32 | 0.66 | 0.56 | 1.05 | 0.82 | 1.45 | 1.38 | 1.43 | 1.99 | 1.32 | 3.31  | 1.81 | 1.12 | 1.45 |      |
| 18         | 1013   | 0.33    | 0.68 | 1.17  | 0.83 | 1.91  | 0.39 | 0.18 | 0.27 | 0.39 | 0.48 | 0.24 | 0.20 | 0.38 | 0.30 | 0.52 | 0.50 | 0.52 | 0.72 | 0.48 | 1.20  | 0.66 | 0.41 | 0.53 |      |
| 19         | 1172   | 0.38    | 0.78 | 1.35  | 0.96 | 2.21  | 0.45 | 0.21 | 0.31 | 0.45 | 0.55 | 0.28 | 0.23 | 0.44 | 0.34 | 0.60 | 0.58 | 0.60 | 0.83 | 0.55 | 1.38  | 0.76 | 0.47 | 0.61 |      |
| 20         | 3718   | 1.20    | 2.48 | 4.28  | 3.05 | 7.02  | 1.43 | 0.67 | 1.00 | 1.44 | 1.76 | 0.87 | 0.74 | 1.40 | 1.09 | 1.92 | 1.83 | 1.90 | 2.64 | 1.75 | 4.39  | 2.40 | 1.49 | 1.93 |      |
| 21         | 1857   | 0.60    | 1.24 | 2.14  | 1.52 | 3.50  | 0.71 | 0.33 | 0.50 | 0.72 | 0.88 | 0.44 | 0.37 | 0.70 | 0.54 | 0.96 | 0.92 | 0.95 | 1.32 | 0.88 | 2.19  | 1.20 | 0.74 | 0.96 |      |
| 22         | 2261   | 0.73    | 1.51 | 2.60  | 1.85 | 4.27  | 0.87 | 0.41 | 0.61 | 0.88 | 1.07 | 0.53 | 0.45 | 0.85 | 0.66 | 1.17 | 1.11 | 1.16 | 1.61 | 1.07 | 2.67  | 1.46 | 0.91 | 1.17 |      |
| 23         | 4704   | 1.52    | 3.14 | 5.41  | 3.86 | 8.88  | 1.81 | 0.85 | 1.26 | 1.82 | 2.22 | 1.10 | 0.94 | 1.77 | 1.38 | 2.43 | 2.32 | 2.40 | 3.35 | 2.22 | 5.55  | 3.04 | 1.89 | 2.44 |      |
| 24         | 3097   | 1.00    | 2.07 | 3.56  | 2.54 | 5.84  | 1.19 | 0.56 | 0.83 | 1.20 | 1.46 | 0.73 | 0.62 | 1.17 | 0.91 | 1.60 | 1.53 | 1.58 | 2.20 | 1.46 | 3.66  | 2.00 | 1.24 | 1.61 |      |
| 25         | 229    | 0.07    | 0.15 | 0.26  | 0.19 | 0.43  | 0.09 | 0.04 | 0.06 | 0.09 | 0.11 | 0.05 | 0.05 | 0.09 | 0.07 | 0.12 | 0.11 | 0.12 | 0.16 | 0.11 | 0.27  | 0.15 | 0.09 | 0.12 |      |
| 26         | 335    | 0.11    | 0.22 | 0.39  | 0.27 | 0.63  | 0.13 | 0.06 | 0.09 | 0.13 | 0.16 | 0.08 | 0.07 | 0.13 | 0.10 | 0.17 | 0.17 | 0.17 | 0.24 | 0.16 | 0.40  | 0.22 | 0.13 | 0.17 |      |
| 27         | 230    | 0.07    | 0.15 | 0.26  | 0.19 | 0.43  | 0.09 | 0.04 | 0.06 | 0.09 | 0.11 | 0.05 | 0.05 | 0.09 | 0.07 | 0.12 | 0.11 | 0.12 | 0.16 | 0.11 | 0.27  | 0.15 | 0.09 | 0.12 |      |
| 28         | 112    | 0.04    | 0.07 | 0.13  | 0.09 | 0.21  | 0.04 | 0.02 | 0.03 | 0.04 | 0.05 | 0.03 | 0.02 | 0.04 | 0.03 | 0.06 | 0.06 | 0.06 | 0.08 | 0.05 | 0.13  | 0.07 | 0.04 | 0.06 |      |
| 29         | 173    | 0.06    | 0.12 | 0.20  | 0.14 | 0.33  | 0.07 | 0.03 | 0.05 | 0.07 | 0.08 | 0.04 | 0.03 | 0.07 | 0.05 | 0.09 | 0.09 | 0.09 | 0.12 | 0.08 | 0.20  | 0.11 | 0.07 | 0.09 |      |
| 30         | 42     | 0.01    | 0.03 | 0.05  | 0.03 | 0.08  | 0.02 | 0.01 | 0.01 | 0.02 | 0.02 | 0.01 | 0.01 | 0.02 | 0.01 | 0.02 | 0.02 | 0.02 | 0.03 | 0.02 | 0.05  | 0.03 | 0.02 | 0.02 |      |
| 31         | 175    | 0.06    | 0.12 | 0.20  | 0.14 | 0.33  | 0.07 | 0.03 | 0.05 | 0.07 | 0.08 | 0.04 | 0.03 | 0.07 | 0.05 | 0.09 | 0.09 | 0.09 | 0.12 | 0.08 | 0.21  | 0.11 | 0.07 | 0.09 |      |
| 32         | 251    | 0.08    | 0.17 | 0.29  | 0.21 | 0.47  | 0.10 | 0.05 | 0.07 | 0.10 | 0.12 | 0.06 | 0.05 | 0.09 | 0.07 | 0.13 | 0.12 | 0.13 | 0.18 | 0.12 | 0.30  | 0.16 | 0.10 | 0.13 |      |
| 33         | 312    | 0.10    | 0.21 | 0.36  | 0.26 | 0.59  | 0.12 | 0.06 | 0.08 | 0.12 | 0.15 | 0.07 | 0.06 | 0.12 | 0.09 | 0.16 | 0.15 | 0.16 | 0.22 | 0.15 | 0.37  | 0.20 | 0.13 | 0.16 |      |
| 34         | 202    | 0.07    | 0.13 | 0.23  | 0.17 | 0.38  | 0.08 | 0.04 | 0.05 | 0.08 | 0.10 | 0.05 | 0.04 | 0.08 | 0.06 | 0.10 | 0.10 | 0.10 | 0.14 | 0.10 | 0.24  | 0.13 | 0.08 | 0.10 |      |
| 35         | 400    | 0.13    | 0.27 | 0.46  | 0.33 | 0.75  | 0.15 | 0.07 | 0.11 | 0.16 | 0.19 | 0.09 | 0.08 | 0.15 | 0.12 | 0.21 | 0.20 | 0.20 | 0.28 | 0.19 | 0.47  | 0.26 | 0.16 | 0.21 |      |
| 36         | 54     | 0.02    | 0.04 | 0.06  | 0.04 | 0.10  | 0.02 | 0.01 | 0.01 | 0.02 | 0.03 | 0.01 | 0.01 | 0.02 | 0.02 | 0.03 | 0.03 | 0.03 | 0.04 | 0.03 | 0.06  | 0.03 | 0.02 | 0.03 |      |
| 37         | 7211   | 2.32    | 4.82 | 8.30  | 5.92 | 13.61 | 2.77 | 1.30 | 1.94 | 2.79 | 3.40 | 1.69 | 1.43 | 2.71 | 2.12 | 3.72 | 3.55 | 3.68 | 5.13 | 3.40 | 8.51  | 4.66 | 2.89 | 3.74 |      |
| 38         | 1456   | 0.47    | 0.97 | 1.68  | 1.19 | 2.75  | 0.56 | 0.26 | 0.39 | 0.56 | 0.69 | 0.34 | 0.29 | 0.55 | 0.43 | 0.75 | 0.72 | 0.74 | 1.04 | 0.69 | 1.72  | 0.94 | 0.58 | 0.76 |      |
| 39         | 1361   | 0.44    | 0.91 | 1.57  | 1.12 | 2.57  | 0.52 | 0.25 | 0.37 | 0.53 | 0.64 | 0.32 | 0.27 | 0.51 | 0.40 | 0.70 | 0.67 | 0.70 | 0.97 | 0.64 | 1.61  | 0.88 | 0.55 | 0.71 |      |
| 40         | 2015   | 0.65    | 1.35 | 2.32  | 1.65 | 3.80  | 0.77 | 0.36 | 0.54 | 0.78 | 0.95 | 0.47 | 0.40 | 0.76 | 0.59 | 1.04 | 0.99 | 1.03 | 1.43 | 0.95 | 2.38  | 1.30 | 0.81 | 1.05 |      |
| 41         | 1462   | 0.47    | 0.98 | 1.68  | 1.20 | 2.76  | 0.56 | 0.26 | 0.39 | 0.57 | 0.69 | 0.34 | 0.29 | 0.55 | 0.43 | 0.75 | 0.72 | 0.75 | 1.04 | 0.69 | 1.73  | 0.95 | 0.59 | 0.76 |      |
| 42         | 1542   | 0.50    | 1.03 | 1.77  | 1.26 | 2.91  | 0.59 | 0.28 | 0.41 | 0.60 | 0.73 | 0.36 | 0.31 | 0.58 | 0.45 | 0.80 | 0.76 | 0.79 | 1.10 | 0.73 | 1.82  | 1.00 | 0.62 | 0.80 |      |
| 43         | 5441   | 1.75    | 3.63 | 6.26  | 4.46 | 10.27 | 2.09 | 0.98 | 1.46 | 2.11 | 2.57 | 1.28 | 1.08 | 2.05 | 1.60 | 2.81 | 2.68 | 2.78 | 3.87 | 2.56 | 6.42  | 3.52 | 2.18 | 2.82 |      |
| 44         | 1943   | 0.63    | 1.30 | 2.24  | 1.59 | 3.67  | 0.75 | 0.35 | 0.52 | 0.75 | 0.92 | 0.46 | 0.39 | 0.73 | 0.57 | 1.00 | 0.96 | 0.99 | 1.38 | 0.92 | 2.29  | 1.26 | 0.78 | 1.01 |      |
| 45         | 4410   | 1.42    | 2.95 | 5.07  | 3.62 | 8.32  | 1.69 | 0.79 | 1.18 | 1.71 | 2.08 | 1.04 | 0.88 | 1.66 | 1.29 | 2.27 | 2.17 | 2.25 | 3.14 | 2.08 | 5.21  | 2.85 | 1.77 | 2.29 |      |
| 46         | 1702   | 0.55    | 1.14 | 1.96  | 1.40 | 3.21  | 0.65 | 0.31 | 0.46 | 0.66 | 0.80 | 0.40 | 0.34 | 0.64 | 0.50 | 0.88 | 0.84 | 0.87 | 1.21 | 0.80 | 2.01  | 1.10 | 0.68 | 0.88 |      |
| 47         | 1414   | 0.46    | 0.94 | 1.63  | 1.16 | 2.67  | 0.54 | 0.25 | 0.38 | 0.55 | 0.67 | 0.33 | 0.28 | 0.53 | 0.41 | 0.73 | 0.70 | 0.72 | 1.01 | 0.67 | 1.67  | 0.91 | 0.57 | 0.73 |      |
| 48         | 2616   | 0.84    | 1.75 | 3.01  | 2.15 | 4.94  | 1.00 | 0.47 | 0.70 | 1.01 | 1.24 | 0.61 | 0.52 | 0.98 | 0.77 | 1.35 | 1.29 | 1.34 | 1.86 | 1.23 | 3.09  | 1.69 | 1.05 | 1.36 |      |
| 49         | 3535   | 1.14    | 2.36 | 4.07  | 2.90 | 6.67  | 1.36 | 0.64 | 0.95 | 1.37 | 1.67 | 0.83 | 0.70 | 1.33 | 1.04 | 1.82 | 1.74 | 1.81 | 2.51 | 1.67 | 4.17  | 2.29 | 1.42 | 1.83 |      |
| 50         | 2914   | 0.94    | 1.95 | 3.35  | 2.39 | 5.50  | 1.12 | 0.53 | 0.78 | 1.13 | 1.38 | 0.68 | 0.58 | 1.10 | 0.85 | 1.50 | 1.44 | 1.49 | 2.07 | 1.37 | 3.44  | 1.88 | 1.17 | 1.51 |      |
| 51         | 3417   | 1.10    | 2.28 | 3.93  | 2.80 | 6.45  | 1.31 | 0.62 | 0.92 | 1.32 | 1.61 | 0.80 | 0.68 | 1.29 | 1.00 | 1.76 | 1.68 | 1.75 | 2.43 | 1.61 | 4.03  | 2.21 | 1.37 | 1.77 |      |
| 52         | 594    | 0.19    | 0.40 | 0.68  | 0.49 | 1.12  | 0.23 | 0.11 | 0.16 | 0.23 | 0.28 | 0.14 | 0.12 | 0.22 | 0.17 | 0.31 | 0.29 | 0.30 | 0.42 | 0.28 | 0.70  | 0.38 | 0.24 | 0.31 |      |

pH 1.3 / TiO2 signal ratios

|    | mod-S-2R | TiO2 |      |      |      |      |      |      |      |      |      |      |      |      |      |      |      |      |      |      |       |      |      |      |
|----|----------|------|------|------|------|------|------|------|------|------|------|------|------|------|------|------|------|------|------|------|-------|------|------|------|
|    | Exp      | 1    | 2    | 3    | 4    | 5    | 6    | 7    | 8    | 9    | 10   | 11   | 12   | 13   | 14   | 15   | 16   | 17   | 18   | 19   | 20    | 21   | 22   | 23   |
|    | pH 1.3   | 1118 | 972  | 429  | 1196 | 461  | 741  | 3568 | 2850 | 689  | 2640 | 2712 | 2047 | 1655 | 1499 | 904  | 980  | 892  | 645  | 976  | 340   | 932  | 1058 | 1123 |
| 1  | 4025     | 3.60 | 4.14 | 9.38 | 3.37 | 8.73 | 5.43 | 1.13 | 1.41 | 5.84 | 1.52 | 1.48 | 1.97 | 2.43 | 2.69 | 4.45 | 4.11 | 4.51 | 6.24 | 4.12 | 11.84 | 4.32 | 3.80 | 3.58 |
| 2  | 3700     | 3.31 | 3.81 | 8.62 | 3.09 | 8.03 | 4.99 | 1.04 | 1.30 | 5.37 | 1.40 | 1.36 | 1.81 | 2.24 | 2.47 | 4.09 | 3.78 | 4.15 | 5.74 | 3.79 | 10.88 | 3.97 | 3.50 | 3.29 |
| 3  | 2585     | 2.31 | 2.66 | 6.03 | 2.16 | 5.61 | 3.49 | 0.72 | 0.91 | 3.75 | 0.98 | 0.95 | 1.26 | 1.56 | 1.72 | 2.86 | 2.64 | 2.90 | 4.01 | 2.65 | 7.60  | 2.77 | 2.44 | 2.30 |
| 4  | 2306     | 2.06 | 2.37 | 5.38 | 1.93 | 5.00 | 3.11 | 0.65 | 0.81 | 3.35 | 0.87 | 0.85 | 1.13 | 1.39 | 1.54 | 2.55 | 2.35 | 2.59 | 3.58 | 2.36 | 6.78  | 2.47 | 2.18 | 2.05 |
| 5  | 3904     | 3.49 | 4.02 | 9.10 | 3.26 | 8.47 | 5.27 | 1.09 | 1.37 | 5.67 | 1.48 | 1.44 | 1.91 | 2.36 | 2.60 | 4.32 | 3.98 | 4.38 | 6.05 | 4.00 | 11.48 | 4.19 | 3.69 | 3.48 |
| 6  | 3254     | 2.91 | 3.35 | 7.59 | 2.72 | 7.06 | 4.39 | 0.91 | 1.14 | 4.72 | 1.23 | 1.20 | 1.59 | 1.97 | 2.17 | 3.60 | 3.32 | 3.65 | 5.04 | 3.33 | 9.57  | 3.49 | 3.08 | 2.90 |
| 7  | 3289     | 2.94 | 3.38 | 7.67 | 2.75 | 7.13 | 4.44 | 0.92 | 1.15 | 4.77 | 1.25 | 1.21 | 1.61 | 1.99 | 2.19 | 3.64 | 3.36 | 3.69 | 5.10 | 3.37 | 9.67  | 3.53 | 3.11 | 2.93 |
| 8  | 2915     | 2.61 | 3.00 | 6.79 | 2.44 | 6.32 | 3.93 | 0.82 | 1.02 | 4.23 | 1.10 | 1.07 | 1.42 | 1.76 | 1.94 | 3.22 | 2.97 | 3.27 | 4.52 | 2.99 | 8.57  | 3.13 | 2.76 | 2.60 |
| 9  | 2658     | 2.38 | 2.73 | 6.20 | 2.22 | 5.77 | 3.59 | 0.74 | 0.93 | 3.86 | 1.01 | 0.98 | 1.30 | 1.61 | 1.77 | 2.94 | 2.71 | 2.98 | 4.12 | 2.72 | 7.82  | 2.85 | 2.51 | 2.37 |
| 10 | 3047     | 2.73 | 3.13 | 7.10 | 2.55 | 6.61 | 4.11 | 0.85 | 1.07 | 4.42 | 1.15 | 1.12 | 1.49 | 1.84 | 2.03 | 3.37 | 3.11 | 3.42 | 4.72 | 3.12 | 8.96  | 3.27 | 2.88 | 2.71 |
| 11 | 2179     | 1.95 | 2.24 | 5.08 | 1.82 | 4.73 | 2.94 | 0.61 | 0.76 | 3.16 | 0.83 | 0.80 | 1.06 | 1.32 | 1.45 | 2.41 | 2.22 | 2.44 | 3.38 | 2.23 | 6.41  | 2.34 | 2.06 | 1.94 |
| 12 | 981      | 0.88 | 1.01 | 2.29 | 0.82 | 2.13 | 1.32 | 0.27 | 0.34 | 1.42 | 0.37 | 0.36 | 0.48 | 0.59 | 0.65 | 1.09 | 1.00 | 1.10 | 1.52 | 1.01 | 2.89  | 1.05 | 0.93 | 0.87 |
| 13 | 580      | 0.52 | 0.60 | 1.35 | 0.48 | 1.26 | 0.78 | 0.16 | 0.20 | 0.84 | 0.22 | 0.21 | 0.28 | 0.35 | 0.39 | 0.64 | 0.59 | 0.65 | 0.90 | 0.59 | 1.71  | 0.62 | 0.55 | 0.52 |
| 14 | 1081     | 0.97 | 1.11 | 2.52 | 0.90 | 2.34 | 1.46 | 0.30 | 0.38 | 1.57 | 0.41 | 0.40 | 0.53 | 0.65 | 0.72 | 1.20 | 1.10 | 1.21 | 1.68 | 1.11 | 3.18  | 1.16 | 1.02 | 0.96 |
| 15 | 619      | 0.55 | 0.64 | 1.44 | 0.52 | 1.34 | 0.84 | 0.17 | 0.22 | 0.90 | 0.23 | 0.23 | 0.30 | 0.37 | 0.41 | 0.68 | 0.63 | 0.69 | 0.96 | 0.63 | 1.82  | 0.66 | 0.59 | 0.55 |
| 16 | 297      | 0.27 | 0.31 | 0.69 | 0.25 | 0.64 | 0.40 | 0.08 | 0.10 | 0.43 | 0.11 | 0.11 | 0.15 | 0.18 | 0.20 | 0.33 | 0.30 | 0.33 | 0.46 | 0.30 | 0.87  | 0.32 | 0.28 | 0.26 |
| 17 | 469      | 0.42 | 0.48 | 1.09 | 0.39 | 1.02 | 0.63 | 0.13 | 0.16 | 0.68 | 0.18 | 0.17 | 0.23 | 0.28 | 0.31 | 0.52 | 0.48 | 0.53 | 0.73 | 0.48 | 1.38  | 0.50 | 0.44 | 0.42 |
| 18 | 299      | 0.27 | 0.31 | 0.70 | 0.25 | 0.65 | 0.40 | 0.08 | 0.10 | 0.43 | 0.11 | 0.11 | 0.15 | 0.18 | 0.20 | 0.33 | 0.31 | 0.34 | 0.46 | 0.31 | 0.88  | 0.32 | 0.28 | 0.27 |
| 19 | 336      | 0.30 | 0.35 | 0.78 | 0.28 | 0.73 | 0.45 | 0.09 | 0.12 | 0.49 | 0.13 | 0.12 | 0.16 | 0.20 | 0.22 | 0.37 | 0.34 | 0.38 | 0.52 | 0.34 | 0.99  | 0.36 | 0.32 | 0.30 |
| 20 | 688      | 0.62 | 0.71 | 1.60 | 0.58 | 1.49 | 0.93 | 0.19 | 0.24 | 1.00 | 0.26 | 0.25 | 0.34 | 0.42 | 0.46 | 0.76 | 0.70 | 0.77 | 1.07 | 0.70 | 2.02  | 0.74 | 0.65 | 0.61 |
| 21 | 492      | 0.44 | 0.51 | 1.15 | 0.41 | 1.07 | 0.66 | 0.14 | 0.17 | 0.71 | 0.19 | 0.18 | 0.24 | 0.30 | 0.33 | 0.54 | 0.50 | 0.55 | 0.76 | 0.50 | 1.45  | 0.53 | 0.47 | 0.44 |
| 22 | 858      | 0.77 | 0.88 | 2.00 | 0.72 | 1.86 | 1.16 | 0.24 | 0.30 | 1.25 | 0.33 | 0.32 | 0.42 | 0.52 | 0.57 | 0.95 | 0.88 | 0.96 | 1.33 | 0.88 | 2.52  | 0.92 | 0.81 | 0.76 |
| 23 | 1423     | 1.27 | 1.46 | 3.32 | 1.19 | 3.09 | 1.92 | 0.40 | 0.50 | 2.07 | 0.54 | 0.52 | 0.70 | 0.86 | 0.95 | 1.57 | 1.45 | 1.60 | 2.21 | 1.46 | 4.19  | 1.53 | 1.34 | 1.27 |
| 24 | 1285     | 1.15 | 1.32 | 3.00 | 1.07 | 2.79 | 1.73 | 0.36 | 0.45 | 1.87 | 0.49 | 0.47 | 0.63 | 0.78 | 0.86 | 1.42 | 1.31 | 1.44 | 1.99 | 1.32 | 3.78  | 1.38 | 1.21 | 1.14 |
| 25 | 14       | 0.01 | 0.01 | 0.03 | 0.01 | 0.03 | 0.02 | 0.00 | 0.00 | 0.02 | 0.01 | 0.01 | 0.01 | 0.01 | 0.01 | 0.02 | 0.01 | 0.02 | 0.02 | 0.01 | 0.04  | 0.02 | 0.01 | 0.01 |
| 26 | 113      | 0.10 | 0.12 | 0.26 | 0.09 | 0.25 | 0.15 | 0.03 | 0.04 | 0.16 | 0.04 | 0.04 | 0.06 | 0.07 | 0.08 | 0.13 | 0.12 | 0.13 | 0.18 | 0.12 | 0.33  | 0.12 | 0.11 | 0.10 |
| 27 | 17       | 0.02 | 0.02 | 0.04 | 0.01 | 0.04 | 0.02 | 0.00 | 0.01 | 0.02 | 0.01 | 0.01 | 0.01 | 0.01 | 0.01 | 0.02 | 0.02 | 0.02 | 0.03 | 0.02 | 0.05  | 0.02 | 0.02 | 0.02 |
| 28 | 20       | 0.02 | 0.02 | 0.05 | 0.02 | 0.04 | 0.03 | 0.01 | 0.01 | 0.03 | 0.01 | 0.01 | 0.01 | 0.01 | 0.01 | 0.02 | 0.02 | 0.02 | 0.03 | 0.02 | 0.06  | 0.02 | 0.02 | 0.02 |
| 29 | 23       | 0.02 | 0.02 | 0.05 | 0.02 | 0.05 | 0.03 | 0.01 | 0.01 | 0.03 | 0.01 | 0.01 | 0.01 | 0.01 | 0.02 | 0.03 | 0.02 | 0.03 | 0.04 | 0.02 | 0.07  | 0.02 | 0.02 | 0.02 |
| 30 | 6        | 0.01 | 0.01 | 0.01 | 0.01 | 0.01 | 0.01 | 0.00 | 0.00 | 0.01 | 0.00 | 0.00 | 0.00 | 0.00 | 0.00 | 0.01 | 0.01 | 0.01 | 0.01 | 0.01 | 0.02  | 0.01 | 0.01 | 0.01 |
| 31 | 35       | 0.03 | 0.04 | 0.08 | 0.03 | 0.08 | 0.05 | 0.01 | 0.01 | 0.05 | 0.01 | 0.01 | 0.02 | 0.02 | 0.02 | 0.04 | 0.04 | 0.04 | 0.05 | 0.04 | 0.10  | 0.04 | 0.03 | 0.03 |
| 32 | 81       | 0.07 | 0.08 | 0.19 | 0.07 | 0.18 | 0.11 | 0.02 | 0.03 | 0.12 | 0.03 | 0.03 | 0.04 | 0.05 | 0.05 | 0.09 | 0.08 | 0.09 | 0.13 | 0.08 | 0.24  | 0.09 | 0.08 | 0.07 |
| 33 | 63       | 0.06 | 0.06 | 0.15 | 0.05 | 0.14 | 0.09 | 0.02 | 0.02 | 0.09 | 0.02 | 0.02 | 0.03 | 0.04 | 0.04 | 0.07 | 0.06 | 0.07 | 0.10 | 0.06 | 0.19  | 0.07 | 0.06 | 0.06 |
| 34 | 19       | 0.02 | 0.02 | 0.04 | 0.02 | 0.04 | 0.03 | 0.01 | 0.01 | 0.03 | 0.01 | 0.01 | 0.01 | 0.01 | 0.01 | 0.02 | 0.02 | 0.02 | 0.03 | 0.02 | 0.06  | 0.02 | 0.02 | 0.02 |
| 35 | 39       | 0.03 | 0.04 | 0.09 | 0.03 | 0.08 | 0.05 | 0.01 | 0.01 | 0.06 | 0.01 | 0.01 | 0.02 | 0.02 | 0.03 | 0.04 | 0.04 | 0.04 | 0.06 | 0.04 | 0.11  | 0.04 | 0.04 | 0.03 |
| 36 | 1        | 0.00 | 0.00 | 0.00 | 0.00 | 0.00 | 0.00 | 0.00 | 0.00 | 0.00 | 0.00 | 0.00 | 0.00 | 0.00 | 0.00 | 0.00 | 0.00 | 0.00 | 0.00 | 0.00 | 0.00  | 0.00 | 0.00 | 0.00 |
| 37 | 2072     | 1.85 | 2.13 | 4.83 | 1.73 | 4.49 | 2.80 | 0.58 | 0.73 | 3.01 | 0.78 | 0.76 | 1.01 | 1.25 | 1.38 | 2.29 | 2.11 | 2.32 | 3.21 | 2.12 | 6.09  | 2.22 | 1.96 | 1.85 |
| 38 | 280      | 0.25 | 0.29 | 0.65 | 0.23 | 0.61 | 0.38 | 0.08 | 0.10 | 0.41 | 0.11 | 0.10 | 0.14 | 0.17 | 0.19 | 0.31 | 0.29 | 0.31 | 0.43 | 0.29 | 0.82  | 0.30 | 0.26 | 0.25 |
| 39 | 433      | 0.39 | 0.45 | 1.01 | 0.36 | 0.94 | 0.58 | 0.12 | 0.15 | 0.63 | 0.16 | 0.16 | 0.21 | 0.26 | 0.29 | 0.48 | 0.44 | 0.49 | 0.67 | 0.44 | 1.27  | 0.46 | 0.41 | 0.39 |
| 40 | 755      | 0.68 | 0.78 | 1.76 | 0.63 | 1.64 | 1.02 | 0.21 | 0.26 | 1.10 | 0.29 | 0.28 | 0.37 | 0.46 | 0.50 | 0.84 | 0.77 | 0.85 | 1.17 | 0.77 | 2.22  | 0.81 | 0.71 | 0.67 |
| 41 | 829      | 0.74 | 0.85 | 1.93 | 0.69 | 1.80 | 1.12 | 0.23 | 0.29 | 1.20 | 0.31 | 0.31 | 0.40 | 0.50 | 0.55 | 0.92 | 0.85 | 0.93 | 1.29 | 0.85 | 2.44  | 0.89 | 0.78 | 0.74 |
| 42 | 442      | 0.40 | 0.45 | 1.03 | 0.37 | 0.96 | 0.60 | 0.12 | 0.16 | 0.64 | 0.17 | 0.16 | 0.22 | 0.27 | 0.29 | 0.49 | 0.45 | 0.50 | 0.69 | 0.45 | 1.30  | 0.47 | 0.42 | 0.39 |
| 43 | 1686     | 1.51 | 1.73 | 3.93 | 1.41 | 3.66 | 2.28 | 0.47 | 0.59 | 2.45 | 0.64 | 0.62 | 0.82 | 1.02 | 1.12 | 1.87 | 1.72 | 1.89 | 2.61 | 1.73 | 4.96  | 1.81 | 1.59 | 1.50 |
| 44 | 1120     | 1.00 | 1.15 | 2.61 | 0.94 | 2.43 | 1.51 | 0.31 | 0.39 | 1.63 | 0.42 | 0.41 | 0.55 | 0.68 | 0.75 | 1.24 | 1.14 | 1.26 | 1.74 | 1.15 | 3.29  | 1.20 | 1.06 | 1.00 |
| 45 | 1402     | 1.25 | 1.44 | 3.27 | 1.17 | 3.04 | 1.89 | 0.39 | 0.49 | 2.03 | 0.53 | 0.52 | 0.68 | 0.85 | 0.94 | 1.55 | 1.43 | 1.57 | 2.17 | 1.44 | 4.12  | 1.50 | 1.33 | 1.25 |
| 46 | 545      | 0.49 | 0.56 | 1.27 | 0.46 | 1.18 | 0.74 | 0.15 | 0.19 | 0.79 | 0.21 | 0.20 | 0.27 | 0.33 | 0.36 | 0.60 | 0.56 | 0.61 | 0.84 | 0.56 | 1.60  | 0.58 | 0.52 | 0.49 |
| 47 | 323      | 0.29 | 0.33 | 0.75 | 0.27 | 0.70 | 0.44 | 0.09 | 0.11 | 0.47 | 0.12 | 0.12 | 0.16 | 0.20 | 0.22 | 0.36 | 0.33 | 0.36 | 0.50 | 0.33 | 0.95  | 0.35 | 0.31 | 0.29 |
| 48 | 564      | 0.50 | 0.58 | 1.31 | 0.47 | 1.22 | 0.76 | 0.16 | 0.20 | 0.82 | 0.21 | 0.21 | 0.28 | 0.34 | 0.38 | 0.62 | 0.58 | 0.63 | 0.87 | 0.58 | 1.66  | 0.61 | 0.53 | 0.50 |
| 49 | 1297     | 1.16 | 1.33 | 3.02 | 1.08 | 2.81 | 1.75 | 0.36 | 0.46 | 1.88 | 0.49 | 0.48 | 0.63 | 0.78 | 0.87 | 1.43 | 1.32 | 1.45 | 2.01 | 1.33 | 3.81  | 1.39 | 1.23 | 1.15 |
| 50 | 880      | 0.79 | 0.91 | 2.05 | 0.74 | 1.91 | 1.19 | 0.25 | 0.31 | 1.28 | 0.33 | 0.32 | 0.43 | 0.53 | 0.59 | 0.97 | 0.90 | 0.99 | 1.36 | 0.90 | 2.59  | 0.94 | 0.83 | 0.78 |
| 51 | 997      | 0.89 | 1.03 | 2.32 | 0.83 | 2.16 | 1.35 | 0.28 | 0.35 | 1.45 | 0.38 | 0.37 | 0.49 | 0.60 | 0.67 | 1.10 | 1.02 | 1.12 | 1.55 | 1.02 | 2.93  | 1.07 | 0.94 | 0.89 |
| 52 | 357      | 0.32 | 0.37 | 0.83 | 0.30 | 0.77 | 0.48 | 0.10 | 0.13 | 0.52 | 0.14 | 0.13 | 0.17 | 0.22 | 0.24 | 0.39 | 0.36 | 0.40 | 0.55 | 0.37 | 1.05  | 0.38 | 0.34 | 0.32 |
| 53 | 1499</   |      |      |      |      |      |      |      |      |      |      |      |      |      |      |      |      |      |      |      |       |      |      |      |







Significance test

pH 1.3/TiO<sub>2</sub> signal area ratio

|          | Average | SEM  |
|----------|---------|------|
| mod-S-R  | 1.58    | 0.05 |
| mod-S-2R | 1.20    | 0.04 |
| mod-Y-R  | 1.80    | 0.05 |
| mod-Y-2R | 1.64    | 0.06 |

Paired t-test

TiO<sub>2</sub> vs pH 1.3

p-values for all pairs

|          | mod-S-R  | mod-S-2R | mod-Y-R  | mod-Y-2R |
|----------|----------|----------|----------|----------|
| mod-S-R  |          | 2.19E-38 | 1.25E-30 | 0.114    |
| mod-S-2R | 2.19E-38 |          | 1.30E-74 | 8.12E-85 |
| mod-Y-R  | 1.25E-30 | 1.30E-74 |          | 3.92E-06 |
| mod-Y-2R | 0.114    | 8.12E-85 | 3.92E-06 |          |

Significant difference between peptides

Not significant difference between peptides

# Appendix F

Raw data and significance tests

TiO<sub>2</sub>: non-washed vs. washed with 10 mM  
phosphate

Raw data (signal areas)

**TiO2**

**Phosphate 10 mM**

|         | S-R      | S-2R     | Y-R      | Y-2R     |
|---------|----------|----------|----------|----------|
| 1       | 3102     | 1118     | 4080     | 1086     |
| 2       | 1497     | 972      | 3370     | 1755     |
| 3       | 869      | 429      | 2735     | 788      |
| 4       | 1219     | 1196     | 2482     | 1712     |
| 5       | 530      | 461      | 1245     | 665      |
| 6       | 2603     | 741      | 4347     | 797      |
| 7       | 5549     | 3568     | 12181    | 6507     |
| 8       | 3722     | 2850     | 7000     | 5412     |
| 9       | 2580     | 689      | 6227     | 1292     |
| 10      | 2118     | 2640     | 4632     | 5398     |
| 11      | 4258     | 2712     | 11499    | 6440     |
| 12      | 5030     | 2047     | 9804     | 3752     |
| 13      | 2657     | 1655     | 8280     | 3483     |
| 14      | 3409     | 1499     | 7932     | 2954     |
| 15      | 1939     | 904      | 3642     | 1660     |
| 16      | 2029     | 980      | 3272     | 1625     |
| 17      | 1957     | 892      | 3556     | 1502     |
| 18      | 1406     | 645      | 2655     | 1171     |
| 19      | 2122     | 976      | 4093     | 1847     |
| 20      | 847      | 340      | 1921     | 728      |
| 21      | 1546     | 932      | 3230     | 1716     |
| 22      | 2495     | 1058     | 3189     | 1275     |
| 23      | 1928     | 1123     | 3698     | 2125     |
| Average | 2409.217 | 1322.913 | 5003.043 | 2421.304 |
| Stdev   | 1293.283 | 864.8099 | 3031.676 | 1845.683 |
| SEM     | 269.6681 | 180.3253 | 632.1481 | 384.8516 |

|         | S-R      | S-2R     | Y-R        | Y-2R     |
|---------|----------|----------|------------|----------|
| 1       | 804      | 649      | 1685       | 1219     |
| 2       | 2077     | 1866     | 3649       | 3047     |
| 3       | 743      | 661      | 1243       | 1080     |
| 4       | 49       | 39       | 217        | 140      |
| 5       | 94       | 94       | 335        | 286      |
| 6       | 149      | 170      | 489        | 375      |
| 7       | 819      | 674      | 1607       | 1107     |
| 8       | 99       | 99       | 291        | 300      |
| 9       | 87       | 74       | 214        | 188      |
| 10      | 121      | 115      | 425        | 610      |
| 11      | 131      | 124      | 418        | 482      |
| 12      | 80       | 62       | 183        | 171      |
| 13      | 34       | 24       | 147        | 118      |
| 14      | 211      | 190      | 458        | 328      |
| 15      | 76       | 65       | 323        | 268      |
| 16      | 96       | 51       | 449        | 217      |
| 17      | 175      | 87       | 611        | 330      |
| 18      | 122      | 89       | 444        | 329      |
| 19      | 52       | 27       | 206        | 95       |
| 20      | 102      | 33       | 303        | 107      |
| 21      | 341      | 372      | 769        | 770      |
| 22      | 192      | 88       | 386        | 140      |
| 23      | 738      | 1040     | 1733       | 1738     |
| 24      | 933      | 977      | 1720       | 1305     |
| 25      | 411      | 257      | 1085       | 455      |
| 26      | 704      | 725      | 1912       | 1429     |
| 27      | 440      | 511      | 1057       | 837      |
| 28      | 724      | 692      | 1772       | 1394     |
| 29      | 410      | 272      | 956        | 431      |
| 30      | 1562     | 946      | 3587       | 1885     |
| 31      | 450      | 61       | 456        | 36       |
| 32      | 1052     | 1002     | 2535       | 1981     |
| 33      | 1671     | 1119     | 3197       | 2159     |
| 34      | 146      | 36       | 184        | 30       |
| 35      | 740      | 772      | 1855       | 1693     |
| 36      | 2734     | 1929     | 6306       | 4001     |
| 37      | 2912     | 2916     | 5607       | 4562     |
| 38      | 2047     | 2071     | 4331       | 3689     |
| 39      | 2760     | 2457     | 5566       | 3913     |
| 40      | 2999     | 2249     | 6289       | 3921     |
| 41      | 1962     | 1818     | 3712       | 3295     |
| 42      | 2651     | 2338     | 5134       | 3852     |
| Average | 826.1905 | 710.5    | 1758.2381  | 1293.167 |
| Stdev   | 931.6271 | 818.3781 | 1868.45349 | 1367.183 |
| SEM     | 143.7532 | 126.2785 | 288.308632 | 210.9609 |









Phosphate 10 mM / TiO2 signal ratios

| mod-Y-2R |                 | TiO2 |      |      |      |      |      |      |      |      |      |      |      |      |      |      |      |      |      |      |      |      |      |      |
|----------|-----------------|------|------|------|------|------|------|------|------|------|------|------|------|------|------|------|------|------|------|------|------|------|------|------|
| Exp      | Phosphate 10 mM | 1    | 2    | 3    | 4    | 5    | 6    | 7    | 8    | 9    | 10   | 11   | 12   | 13   | 14   | 15   | 16   | 17   | 18   | 1847 | 728  | 1716 | 1275 | 2125 |
| 1        | 1219            | 1.12 | 0.69 | 1.55 | 0.71 | 1.83 | 1.53 | 0.19 | 0.23 | 0.94 | 0.23 | 0.19 | 0.32 | 0.35 | 0.41 | 0.73 | 0.75 | 0.81 | 1.04 | 0.66 | 1.67 | 0.71 | 0.96 | 0.57 |
| 2        | 3047            | 2.81 | 1.74 | 3.87 | 1.78 | 4.58 | 3.82 | 0.47 | 0.56 | 2.36 | 0.56 | 0.47 | 0.81 | 0.87 | 1.03 | 1.84 | 1.88 | 2.03 | 2.60 | 1.65 | 4.19 | 1.78 | 2.39 | 1.43 |
| 3        | 1080            | 0.99 | 0.62 | 1.37 | 0.63 | 1.62 | 1.36 | 0.17 | 0.20 | 0.84 | 0.20 | 0.17 | 0.29 | 0.31 | 0.37 | 0.65 | 0.66 | 0.72 | 0.92 | 0.58 | 1.48 | 0.63 | 0.85 | 0.51 |
| 4        | 140             | 0.13 | 0.08 | 0.18 | 0.08 | 0.21 | 0.18 | 0.02 | 0.03 | 0.11 | 0.03 | 0.02 | 0.04 | 0.04 | 0.05 | 0.08 | 0.09 | 0.09 | 0.12 | 0.08 | 0.19 | 0.08 | 0.11 | 0.07 |
| 5        | 286             | 0.26 | 0.16 | 0.36 | 0.17 | 0.43 | 0.36 | 0.04 | 0.05 | 0.22 | 0.05 | 0.04 | 0.08 | 0.08 | 0.10 | 0.17 | 0.18 | 0.19 | 0.24 | 0.15 | 0.39 | 0.17 | 0.22 | 0.13 |
| 6        | 375             | 0.35 | 0.21 | 0.48 | 0.22 | 0.56 | 0.47 | 0.06 | 0.07 | 0.29 | 0.07 | 0.06 | 0.10 | 0.11 | 0.13 | 0.23 | 0.23 | 0.25 | 0.32 | 0.20 | 0.52 | 0.22 | 0.29 | 0.18 |
| 7        | 1107            | 1.02 | 0.63 | 1.40 | 0.65 | 1.66 | 1.39 | 0.17 | 0.20 | 0.86 | 0.21 | 0.17 | 0.30 | 0.32 | 0.37 | 0.67 | 0.68 | 0.74 | 0.95 | 0.60 | 1.52 | 0.65 | 0.87 | 0.52 |
| 8        | 300             | 0.28 | 0.17 | 0.38 | 0.18 | 0.45 | 0.38 | 0.05 | 0.06 | 0.23 | 0.06 | 0.05 | 0.08 | 0.09 | 0.10 | 0.18 | 0.18 | 0.20 | 0.26 | 0.16 | 0.41 | 0.17 | 0.24 | 0.14 |
| 9        | 188             | 0.17 | 0.11 | 0.24 | 0.11 | 0.28 | 0.24 | 0.03 | 0.03 | 0.15 | 0.03 | 0.03 | 0.05 | 0.05 | 0.06 | 0.11 | 0.12 | 0.13 | 0.16 | 0.10 | 0.26 | 0.11 | 0.15 | 0.09 |
| 10       | 610             | 0.56 | 0.35 | 0.77 | 0.36 | 0.92 | 0.77 | 0.09 | 0.11 | 0.47 | 0.11 | 0.09 | 0.16 | 0.18 | 0.21 | 0.37 | 0.38 | 0.41 | 0.52 | 0.33 | 0.84 | 0.36 | 0.48 | 0.29 |
| 11       | 482             | 0.44 | 0.27 | 0.61 | 0.28 | 0.72 | 0.60 | 0.07 | 0.09 | 0.37 | 0.09 | 0.07 | 0.13 | 0.14 | 0.16 | 0.29 | 0.30 | 0.32 | 0.41 | 0.26 | 0.66 | 0.28 | 0.38 | 0.23 |
| 12       | 171             | 0.16 | 0.10 | 0.22 | 0.10 | 0.26 | 0.21 | 0.03 | 0.03 | 0.13 | 0.03 | 0.03 | 0.05 | 0.05 | 0.06 | 0.10 | 0.11 | 0.11 | 0.15 | 0.09 | 0.23 | 0.10 | 0.13 | 0.08 |
| 13       | 118             | 0.11 | 0.07 | 0.15 | 0.07 | 0.18 | 0.15 | 0.02 | 0.02 | 0.09 | 0.02 | 0.02 | 0.03 | 0.03 | 0.04 | 0.07 | 0.07 | 0.08 | 0.10 | 0.06 | 0.16 | 0.07 | 0.09 | 0.06 |
| 14       | 328             | 0.30 | 0.19 | 0.42 | 0.19 | 0.49 | 0.41 | 0.05 | 0.06 | 0.25 | 0.06 | 0.05 | 0.09 | 0.09 | 0.11 | 0.20 | 0.20 | 0.22 | 0.28 | 0.18 | 0.45 | 0.19 | 0.26 | 0.15 |
| 15       | 268             | 0.25 | 0.15 | 0.34 | 0.16 | 0.40 | 0.34 | 0.04 | 0.05 | 0.21 | 0.05 | 0.04 | 0.07 | 0.08 | 0.09 | 0.16 | 0.16 | 0.18 | 0.23 | 0.15 | 0.37 | 0.16 | 0.21 | 0.13 |
| 16       | 217             | 0.20 | 0.12 | 0.28 | 0.13 | 0.33 | 0.27 | 0.03 | 0.04 | 0.17 | 0.04 | 0.03 | 0.06 | 0.06 | 0.07 | 0.13 | 0.13 | 0.14 | 0.19 | 0.12 | 0.30 | 0.13 | 0.17 | 0.10 |
| 17       | 330             | 0.30 | 0.19 | 0.42 | 0.19 | 0.50 | 0.41 | 0.05 | 0.06 | 0.26 | 0.06 | 0.05 | 0.09 | 0.09 | 0.11 | 0.20 | 0.20 | 0.22 | 0.28 | 0.18 | 0.45 | 0.19 | 0.26 | 0.16 |
| 18       | 329             | 0.30 | 0.19 | 0.42 | 0.19 | 0.49 | 0.41 | 0.05 | 0.06 | 0.25 | 0.06 | 0.05 | 0.09 | 0.09 | 0.11 | 0.20 | 0.20 | 0.22 | 0.28 | 0.18 | 0.45 | 0.19 | 0.26 | 0.15 |
| 19       | 95              | 0.09 | 0.05 | 0.12 | 0.06 | 0.14 | 0.12 | 0.01 | 0.02 | 0.07 | 0.02 | 0.01 | 0.03 | 0.03 | 0.03 | 0.06 | 0.06 | 0.06 | 0.08 | 0.05 | 0.13 | 0.06 | 0.07 | 0.04 |
| 20       | 107             | 0.10 | 0.06 | 0.14 | 0.06 | 0.16 | 0.13 | 0.02 | 0.02 | 0.08 | 0.02 | 0.02 | 0.03 | 0.03 | 0.04 | 0.06 | 0.07 | 0.07 | 0.09 | 0.06 | 0.15 | 0.06 | 0.08 | 0.05 |
| 21       | 770             | 0.71 | 0.44 | 0.98 | 0.45 | 1.16 | 0.97 | 0.12 | 0.14 | 0.60 | 0.14 | 0.12 | 0.21 | 0.22 | 0.26 | 0.46 | 0.47 | 0.51 | 0.66 | 0.42 | 1.06 | 0.45 | 0.60 | 0.36 |
| 22       | 140             | 0.13 | 0.08 | 0.18 | 0.08 | 0.21 | 0.18 | 0.02 | 0.03 | 0.11 | 0.03 | 0.02 | 0.04 | 0.04 | 0.05 | 0.08 | 0.09 | 0.09 | 0.12 | 0.08 | 0.19 | 0.08 | 0.11 | 0.07 |
| 23       | 1738            | 1.60 | 0.99 | 2.21 | 1.02 | 2.61 | 2.18 | 0.27 | 0.32 | 1.35 | 0.32 | 0.27 | 0.46 | 0.50 | 0.59 | 1.05 | 1.07 | 1.16 | 1.48 | 0.94 | 2.39 | 1.01 | 1.36 | 0.82 |
| 24       | 1305            | 1.20 | 0.74 | 1.66 | 0.76 | 1.96 | 1.64 | 0.20 | 0.24 | 1.01 | 0.24 | 0.20 | 0.35 | 0.37 | 0.44 | 0.79 | 0.80 | 0.87 | 1.11 | 0.71 | 1.79 | 0.76 | 1.02 | 0.61 |
| 25       | 455             | 0.42 | 0.26 | 0.58 | 0.27 | 0.68 | 0.57 | 0.07 | 0.08 | 0.35 | 0.08 | 0.07 | 0.12 | 0.13 | 0.15 | 0.27 | 0.28 | 0.30 | 0.39 | 0.25 | 0.63 | 0.27 | 0.36 | 0.21 |
| 26       | 1429            | 1.32 | 0.81 | 1.81 | 0.83 | 2.15 | 1.79 | 0.22 | 0.26 | 1.11 | 0.26 | 0.22 | 0.38 | 0.41 | 0.48 | 0.86 | 0.88 | 0.95 | 1.22 | 0.77 | 1.96 | 0.83 | 1.12 | 0.67 |
| 27       | 837             | 0.77 | 0.48 | 1.06 | 0.49 | 1.26 | 1.05 | 0.13 | 0.15 | 0.65 | 0.16 | 0.13 | 0.22 | 0.24 | 0.28 | 0.50 | 0.52 | 0.56 | 0.71 | 0.45 | 1.15 | 0.49 | 0.66 | 0.39 |
| 28       | 1394            | 1.28 | 0.79 | 1.77 | 0.81 | 2.10 | 1.75 | 0.21 | 0.26 | 1.08 | 0.26 | 0.22 | 0.37 | 0.40 | 0.47 | 0.84 | 0.86 | 0.93 | 1.19 | 0.75 | 1.91 | 0.81 | 1.09 | 0.66 |
| 29       | 431             | 0.40 | 0.25 | 0.55 | 0.25 | 0.65 | 0.54 | 0.07 | 0.08 | 0.33 | 0.08 | 0.07 | 0.11 | 0.12 | 0.15 | 0.26 | 0.27 | 0.29 | 0.37 | 0.23 | 0.59 | 0.25 | 0.34 | 0.20 |
| 30       | 1885            | 1.74 | 1.07 | 2.39 | 1.10 | 2.83 | 2.37 | 0.29 | 0.35 | 1.46 | 0.35 | 0.29 | 0.50 | 0.54 | 0.64 | 1.14 | 1.16 | 1.25 | 1.61 | 1.02 | 2.59 | 1.10 | 1.48 | 0.89 |
| 31       | 36              | 0.03 | 0.02 | 0.05 | 0.02 | 0.05 | 0.05 | 0.01 | 0.01 | 0.03 | 0.01 | 0.01 | 0.01 | 0.01 | 0.01 | 0.02 | 0.02 | 0.02 | 0.03 | 0.02 | 0.05 | 0.02 | 0.03 | 0.02 |
| 32       | 1981            | 1.82 | 1.13 | 2.51 | 1.16 | 2.98 | 2.49 | 0.30 | 0.37 | 1.53 | 0.37 | 0.31 | 0.53 | 0.57 | 0.67 | 1.19 | 1.22 | 1.32 | 1.69 | 1.07 | 2.72 | 1.15 | 1.55 | 0.93 |
| 33       | 2159            | 1.99 | 1.23 | 2.74 | 1.26 | 3.25 | 2.71 | 0.33 | 0.40 | 1.67 | 0.40 | 0.34 | 0.58 | 0.62 | 0.73 | 1.30 | 1.33 | 1.44 | 1.84 | 1.17 | 2.97 | 1.26 | 1.69 | 1.02 |
| 34       | 30              | 0.03 | 0.02 | 0.04 | 0.02 | 0.05 | 0.04 | 0.00 | 0.01 | 0.02 | 0.01 | 0.00 | 0.01 | 0.01 | 0.01 | 0.02 | 0.02 | 0.02 | 0.03 | 0.02 | 0.04 | 0.02 | 0.02 | 0.01 |
| 35       | 1693            | 1.56 | 0.96 | 2.15 | 0.99 | 2.55 | 2.12 | 0.26 | 0.31 | 1.31 | 0.31 | 0.26 | 0.45 | 0.49 | 0.57 | 1.02 | 1.04 | 1.13 | 1.45 | 0.92 | 2.33 | 0.99 | 1.33 | 0.80 |
| 36       | 4001            | 3.68 | 2.28 | 5.08 | 2.34 | 6.02 | 5.02 | 0.61 | 0.74 | 3.10 | 0.74 | 0.62 | 1.07 | 1.15 | 1.35 | 2.41 | 2.46 | 2.66 | 3.42 | 2.17 | 5.50 | 2.33 | 3.14 | 1.88 |
| 37       | 4562            | 4.20 | 2.60 | 5.79 | 2.66 | 6.86 | 5.72 | 0.70 | 0.84 | 3.53 | 0.85 | 0.71 | 1.22 | 1.31 | 1.54 | 2.75 | 2.81 | 3.04 | 3.90 | 2.47 | 6.27 | 2.66 | 3.58 | 2.15 |
| 38       | 3689            | 3.40 | 2.10 | 4.68 | 2.15 | 5.55 | 4.63 | 0.57 | 0.68 | 2.86 | 0.68 | 0.57 | 0.98 | 1.06 | 1.25 | 2.22 | 2.27 | 2.46 | 3.15 | 2.00 | 5.07 | 2.15 | 2.89 | 1.74 |
| 39       | 3913            | 3.60 | 2.23 | 4.97 | 2.29 | 5.88 | 4.91 | 0.60 | 0.72 | 3.03 | 0.72 | 0.61 | 1.04 | 1.12 | 1.32 | 2.36 | 2.41 | 2.61 | 3.34 | 2.12 | 5.38 | 2.28 | 3.07 | 1.84 |
| 40       | 3921            | 3.61 | 2.23 | 4.98 | 2.29 | 5.90 | 4.92 | 0.60 | 0.72 | 3.03 | 0.73 | 0.61 | 1.05 | 1.13 | 1.33 | 2.36 | 2.41 | 2.61 | 3.35 | 2.12 | 5.39 | 2.28 | 3.08 | 1.85 |
| 41       | 3295            | 3.03 | 1.88 | 4.18 | 1.92 | 4.95 | 4.13 | 0.51 | 0.61 | 2.55 | 0.61 | 0.51 | 0.88 | 0.95 | 1.12 | 1.98 | 2.03 | 2.19 | 2.81 | 1.78 | 4.53 | 1.92 | 2.58 | 1.55 |
| 42       | 3852            | 3.55 | 2.19 | 4.89 | 2.25 | 5.79 | 4.83 | 0.59 | 0.71 | 2.98 | 0.71 | 0.60 | 1.03 | 1.11 | 1.30 | 2.32 | 2.37 | 2.56 | 3.29 | 2.09 | 5.29 | 2.24 | 3.02 | 1.81 |

Significance test

Phosphate/TiO<sub>2</sub> signal area ratio

|          | Average | SEM  |
|----------|---------|------|
| mod-S-R  | 0.47    | 0.02 |
| mod-S-2R | 0.77    | 0.04 |
| mod-Y-R  | 0.48    | 0.02 |
| mod-Y-2R | 0.84    | 0.04 |

Paired t-test

TiO<sub>2</sub> vs Phosphate 10 mM

p-values for all pairs

|          | mod-S-R  | mod-S-2R | mod-Y-R  | mod-Y-2R |
|----------|----------|----------|----------|----------|
| mod-S-R  |          | 9.02E-51 | 0.101    | 6.52E-65 |
| mod-S-2R | 9.02E-51 |          | 4.59E-41 | 1.78E-10 |
| mod-Y-R  | 0.101    | 4.59E-41 |          | 1.50E-60 |
| mod-Y-2R | 6.52E-65 | 1.78E-10 | 1.50E-60 |          |

Significant difference between peptides

Not significant difference between peptides
